# Supplementary material for: Integrated Analysis Reveals That miR-193b, miR-671, and TREM-1 Correlate With a Good Response to Treatment of Human Localized Cutaneous Leishmaniasis Caused by Leishmania braziliensis
Source: Front Immunol. 2018 Apr 4;9:640. doi: 10.3389/fimmu.2018.00640 (PMC5893808; doi:10.3389/fimmu.2018.00640)
Supplement: Table S1 — Demographic and clinical metadata from Leishmania braziliensis patients. [file Table_1.xlsx]

## Sheet: Plan1
Patient info.		Lesion Characteristics			Etiological agent
Identifier	Sex	Stage	Size (mm²)	Location	Leishmania braziliensis
Patient01	male	ulcer	100	arm	Leishmania braziliensis
Patient02	male	ulcer	250	abdome	Leishmania braziliensis
Patient03	male	ulcer	300	abdome	Leishmania braziliensis
Patient04	female	ulcer	350	abdome	Leishmania braziliensis
Patient05	male	ulcer	100	elbow	Leishmania braziliensis
Patient06	male	ulcer	200	forearm	Leishmania braziliensis
Patient07	male	ulcer	300	leg	Leishmania braziliensis
Patient08	male	ulcer	100	hand	Leishmania braziliensis
Patient09	male	ulcer	500	head	Leishmania braziliensis
Patient10	male	ulcer	250	knee	Leishmania braziliensis
Patient11	male	ulcer	100	foot	Leishmania braziliensis
Patient12	male	ulcer	150	arm	Leishmania braziliensis
