# Supplementary material for: Integrated Analysis Reveals That miR-193b, miR-671, and TREM-1 Correlate With a Good Response to Treatment of Human Localized Cutaneous Leishmaniasis Caused by Leishmania braziliensis
Source: Front Immunol. 2018 Apr 4;9:640. doi: 10.3389/fimmu.2018.00640 (PMC5893808; doi:10.3389/fimmu.2018.00640)
Supplement: Table S2 — MicroRNA probes identified on the Illumina HT 12 v4 platform (GSE55664 data set). [file Table_2.xlsx]

## Sheet: Plan1
ILMN HT 12 V4	ILMN	ENSEMBL	FINAL NAME	BOTH	miRBase ID(s)	High Confidence	Adj. P.Value	Fold Change
ILMN_1805410	C15ORF48	MIR147B	MIR147B	C15ORF48/MIR147B	hsa-mir-147b		5.05e-08	5.77572
ILMN_1669113	ATF5	MIR4751	MIR4751	ATF5/MIR4751	hsa-mir-4751		3.54e-11	3.81055
ILMN_1726597	FAM65B	AL512428.1	AL512428.1	FAM65B/AL512428.1			2.10e-09	3.13834
ILMN_3248910	MIR155HG	MIR155	MIR155	MIR155HG/MIR155	hsa-mir-155	hsa-mir-155	2.71e-09	2.88786
ILMN_1804051	SNX8	MIR6836	MIR6836	SNX8/MIR6836	hsa-mir-6836		2.38e-08	2.86791
ILMN_1794612	UBA7	MIR5193	MIR5193	UBA7/MIR5193	hsa-mir-5193		6.18e-12	2.80889
ILMN_1727315	DENND1A	MIR601	MIR601	DENND1A/MIR601	hsa-mir-601		1.09e-11	2.78949
ILMN_2103841	AIP	MIR6752	MIR6752	AIP/MIR6752	hsa-mir-6752		4.45e-06	1.93053
ILMN_1772991	CHPF2	MIR671	MIR671	CHPF2/MIR671	hsa-mir-671	hsa-mir-671	5.34e-09	1.88035
ILMN_1794085	SAPS1	MIR6804	MIR6804	SAPS1/MIR6804	hsa-mir-6804		6.09e-07	1.70173
ILMN_1794927	LOC90925	MIR5195	MIR5195	LOC90925/MIR5195	hsa-mir-5195		1.00e-04	1.6449
ILMN_1752249	FAM38A	MIR4722	MIR4722	FAM38A/MIR4722	hsa-mir-4722		1.17e-03	1.64262
ILMN_3310371	MIR939	MIR939	MIR939	MIR939	hsa-mir-939		1.61e-02	1.62563
ILMN_3309514	MIR574	MIR574	MIR574	MIR574	hsa-mir-574	hsa-mir-574	5.09e-02	1.58337
ILMN_1733861	ARHGEF11	MIR765	MIR765	ARHGEF11/MIR765	hsa-mir-765		2.91e-05	1.57899
ILMN_1726153	MGC4677	MIR4435-2HG	MIR4435-2HG	MGC4677/MIR4435-2HG			1.90e-05	1.56266
ILMN_1673409	MGC16121	MIR503HG	MIR503HG	MGC16121/MIR503HG			2.18e-03	1.55079
ILMN_1813314	HIST1H2BK	AL021807.1	AL021807.1	HIST1H2BK/AL021807.1			9.76e-02	1.54971
ILMN_3308265	MIR302C	MIR302B	MIR302C	MIR302C/MIR302B	hsa-mir-302b		1.27e-02	1.50629
ILMN_3308728	MIR635	MIR635	MIR635	MIR635	hsa-mir-635		5.69e-07	1.47325
ILMN_3311015	MIR219-2	MIR219B	MIR219-2	MIR219-2/MIR219B	hsa-mir-219a-2	hsa-mir-219a-2	3.21e-10	1.46917
ILMN_3199755	LOC646821	AL451010.1	AL451010.1	LOC646821/AL451010.1			5.77e-08	1.46409
ILMN_1716678	NPC2	MIR4709	MIR4709	NPC2/MIR4709	hsa-mir-4709		1.72e-11	1.45498
ILMN_2347380	ARHGEF11	MIR765	MIR765	ARHGEF11/MIR765	hsa-mir-765		4.84e-03	1.44193
ILMN_3241979	TMEM179B	MIR6748	MIR6748	TMEM179B/MIR6748	hsa-mir-6748		9.03e-02	1.40153
ILMN_1710150	EED	MIR6755	MIR6755	EED/MIR6755	hsa-mir-6755		5.47e-05	1.38992
ILMN_3310306	MIR1224	MIR1224	MIR1224	MIR1224	hsa-mir-1224		1.03e-02	1.33053
ILMN_3310151	MIR1909	MIR1909	MIR1909	MIR1909	hsa-mir-1909		2.59e-02	1.32225
ILMN_3245236	FBRS	AC093249.1	AC093249.1	FBRS/AC093249.1			1.33e-01	1.31677
ILMN_3310840	MIR21	MIR21	MIR21	MIR21	hsa-mir-21		2.28e-02	1.3113
ILMN_1656452	C16ORF59	MIR6768	MIR6768	C16ORF59/MIR6768	hsa-mir-6768		3.33e-05	1.31039
ILMN_3234762	RN5S9	AL713899.1	AL713899.1	RN5S9/AL713899.1			5.48e-01	1.28254
ILMN_1783350	PCNXL3	MIR4690	MIR4690	PCNXL3/MIR4690	hsa-mir-4690		5.57e-03	1.27721
ILMN_3310113	MIR586	MIR586	MIR586	MIR586	hsa-mir-586		1.93e-03	1.27633
ILMN_1725130	FAM50A	MIR6858	MIR6858	FAM50A/MIR6858	hsa-mir-6858		9.85e-02	1.27191
ILMN_3310890	MIR1206	MIR1206	MIR1206	MIR1206			4.43e-05	1.26225
ILMN_1705783	NXF1	MIR6514	MIR6514	NXF1/MIR6514	hsa-mir-6514		2.77e-01	1.232
ILMN_1733757	LOC374395	MIR6748	MIR6748	LOC374395/MIR6748	hsa-mir-6748		3.99e-03	1.23029
ILMN_1738759	PIGT	MIR6812	MIR6812	PIGT/MIR6812	hsa-mir-6812		6.83e-03	1.21504
ILMN_1752559	FBS1	AC093249.1	AC093249.1	FBS1/AC093249.1			4.86e-02	1.20999
ILMN_1725981	LOC654189	MIR4444-2	MIR4444-2	LOC654189/MIR4444-2	hsa-mir-4444-1		5.02e-03	1.20581
ILMN_3308663	MIR1228	MIR1228	MIR1228	MIR1228	hsa-mir-1228		4.55e-02	1.20414
ILMN_3309839	MIR1275	MIR1275	MIR1275	MIR1275	hsa-mir-1275		2.89e-02	1.20414
ILMN_1705602	KLHL17	AL645608.1	AL645608.1	KLHL17/AL645608.1			3.82e-02	1.18921
ILMN_3309534	MIR25	MIR106B	MIR25	MIR25/MIR106B	hsa-mir-106b	hsa-mir-106b	1.15e-01	1.18263
ILMN_2038777	ACTB	AC006483.1	AC006483.1	ACTB/AC006483.1			2.18e-09	1.18099
ILMN_1715332	TTC21A	MIR6822	MIR6822	TTC21A/MIR6822	hsa-mir-6822		5.24e-02	1.18017
ILMN_1716973	POLM	MIR6838	MIR6838	POLM/MIR6838	hsa-mir-6838		1.61e-01	1.16473
ILMN_1663195	MCM7	MIR93	MIR93	MCM7/MIR93	hsa-mir-93	hsa-mir-93	2.54e-01	1.1591
ILMN_1753008	REXO1	MIR1909	MIR1909	REXO1/MIR1909	hsa-mir-1909		2.09e-01	1.14631
ILMN_3309389	MIR147	MIR147A	MIR147	MIR147/MIR147A	hsa-mir-147a		6.46e-03	1.14393
ILMN_3309544	MIR877	MIR877	MIR877	MIR877			3.43e-01	1.13839
ILMN_3257482	LOC100128130	MIR4435-2HG	MIR4435-2HG	LOC100128130/MIR4435-2HG			2.15e-02	1.12506
ILMN_3308738	MIR204	MIR204	MIR204	MIR204			7.94e-03	1.11806
ILMN_3309169	MIR610	MIR610	MIR610	MIR610	hsa-mir-610		6.01e-02	1.11729
ILMN_1796106	MGAT4B	MIR1229	MIR1229	MGAT4B/MIR1229	hsa-mir-1229		4.17e-01	1.11342
ILMN_3308951	MIR200C	MIR200C	MIR200C	MIR200C			2.55e-02	1.11342
ILMN_2253017	LGMN	AC105081.1	AC105081.1	LGMN/AC105081.1			3.50e-01	1.1042
ILMN_3311125	MIR320C1	MIR320C1	MIR320C1	MIR320C1	hsa-mir-320c-1		2.61e-02	1.10343
ILMN_3245893	SNORA1	AP001273.1	AP001273.1	SNORA1/AP001273.1			2.49e-01	1.10191
ILMN_1658925	JAG2	MIR6765	MIR6765	JAG2/MIR6765	hsa-mir-6765		2.91e-02	1.10114
ILMN_1806946	UBTF	MIR6782	MIR6782	UBTF/MIR6782	hsa-mir-6782		4.20e-01	1.10038
ILMN_2106874	CACNG8	MIR935	MIR935	CACNG8/MIR935	hsa-mir-935		4.10e-02	1.10038
ILMN_1680937	HIST1H2BC	U91328.1	U91328.1	HIST1H2BC/U91328.1			5.11e-01	1.09962
ILMN_1904023	HS.579678	AC067969.3	AC067969.3	HS.579678/AC067969.3			1.56e-01	1.09809
ILMN_3309021	MIR142	MIR142	MIR142	MIR142			5.69e-02	1.09733
ILMN_3308936	MIR223	MIR223	MIR223	MIR223	hsa-mir-223	hsa-mir-223	1.57e-01	1.09429
ILMN_1803911	IIP45	MIR6729	MIR6729	IIP45/MIR6729	hsa-mir-6729		7.19e-02	1.09126
ILMN_3308916	MIR1267	MIR1267	MIR1267	MIR1267	hsa-mir-1267		3.66e-02	1.08975
ILMN_1654452	LOC441378	MIR1207	MIR1207	LOC441378/MIR1207	hsa-mir-1207		1.36e-01	1.08824
ILMN_3310583	MIR95	MIR95	MIR95	MIR95	hsa-mir-95		4.93e-02	1.08824
ILMN_1762316	CPSF3L	MIR6727	MIR6727	CPSF3L/MIR6727	hsa-mir-6727		3.64e-01	1.08673
ILMN_3309234	MIR181D	MIR181D	MIR181D	MIR181D	hsa-mir-181d	hsa-mir-181d	1.09e-01	1.08673
ILMN_1805344	DDX5	MIR3064	MIR3064	DDX5/MIR3064	hsa-mir-3064		6.90e-01	1.08598
ILMN_3290323	LOC100131061	AC091167.2	LOC100131061	LOC100131061/AC091167.2			9.12e-02	1.08598
ILMN_3308505	MIR129-2	MIR129-2	MIR129-2	MIR129-2			4.31e-01	1.08598
ILMN_1721984	LOC388161	AC243562.2	LOC388161	LOC388161/AC243562.2			1.55e-01	1.08373
ILMN_3239108	SNORA3	AC091053.1	AC091053.1	SNORA3/AC091053.1			1.21e-01	1.08147
ILMN_3309744	MIR604	MIR604	MIR604	MIR604	hsa-mir-604		1.84e-01	1.08073
ILMN_3310301	MIR342	MIR342	MIR342	MIR342	hsa-mir-342	hsa-mir-342	3.72e-01	1.07998
ILMN_3310765	MIR186	MIR186	MIR186	MIR186	hsa-mir-186	hsa-mir-186	9.00e-02	1.07998
ILMN_3309204	MIRLET7I	MIRLET7I	MIRLET7I	MIRLET7I			7.11e-02	1.07699
ILMN_1736575	TRIM28	MIR6807	MIR6807	TRIM28/MIR6807	hsa-mir-6807		6.00e-01	1.07549
ILMN_3310960	MIR1290	MIR1290	MIR1290	MIR1290	hsa-mir-1290		1.43e-01	1.07549
ILMN_3310456	MIR888	MIR888	MIR888	MIR888	hsa-mir-888		1.19e-01	1.07475
ILMN_3309644	MIR139	MIR139	MIR139	MIR139	hsa-mir-139	hsa-mir-139	2.20e-01	1.074
ILMN_3309834	MIR1537	MIR1537	MIR1537	MIR1537	hsa-mir-1537		1.01e-01	1.074
ILMN_3310850	MIR2113	MIR2113	MIR2113	MIR2113	hsa-mir-2113		1.06e-01	1.074
ILMN_3309189	MIR339	MIR339	MIR339	MIR339			2.10e-01	1.07252
ILMN_3309259	MIR548A2	MIR548A2	MIR548A2	MIR548A2	hsa-mir-548a-2		2.40e-01	1.07177
ILMN_3310499	MIR2115	MIR2115	MIR2115	MIR2115	hsa-mir-2115		2.25e-01	1.07177
ILMN_3311115	MIR663B	MIR663B	MIR663B	MIR663B	hsa-mir-663b		1.95e-01	1.07036
ILMN_3309784	MIR653	MIR653	MIR653	MIR653	hsa-mir-653		2.09e-01	1.07007
ILMN_3310108	MIR571	MIR571	MIR571	MIR571	hsa-mir-571		1.95e-01	1.06851
ILMN_3243938	LOC100133606	AC116562.1	LOC100133606	LOC100133606/AC116562.1			2.06e-01	1.0674
ILMN_3310020	MIR548A3	MIR548A3	MIR548A3	MIR548A3	hsa-mir-548a-3	hsa-mir-548a-3	6.58e-02	1.06622
ILMN_3309789	MIR1302-3	MIR1302-3	MIR1302-3	MIR1302-3	hsa-mir-1302-3		2.57e-01	1.06607
ILMN_3308220	MIR1293	MIR1293	MIR1293	MIR1293	hsa-mir-1293		8.90e-02	1.06444
ILMN_3249543	SNORD125	MIR3653	MIR3653	SNORD125/MIR3653	hsa-mir-3653		3.16e-01	1.06385
ILMN_3308340	MIR487B	MIR381	MIR487B	MIR487B/MIR381			2.92e-01	1.06363
ILMN_1672034	PIM3	MIR6821	MIR6821	PIM3/MIR6821	hsa-mir-6821		4.00e-01	1.06341
ILMN_3309128	MIR638	MIR638	MIR638	MIR638	hsa-mir-638		3.50e-01	1.06341
ILMN_3309443	MIR365-1	MIR365A	MIR365-1	MIR365-1/MIR365A			4.34e-01	1.06326
ILMN_3285591	LOC653075	AC120045.1	LOC653075	LOC653075/AC120045.1			2.12e-01	1.0626
ILMN_3310311	MIR579	MIR579	MIR579	MIR579	hsa-mir-579	hsa-mir-579	2.15e-01	1.06216
ILMN_3308163	MIR941-2	MIR941-5	MIR941-2	MIR941-2/MIR941-5	hsa-mir-941-1		1.61e-01	1.06128
ILMN_3308881	MIR196A1	MIR196A1	MIR196A1	MIR196A1	hsa-mir-196a-1		2.29e-01	1.06128
ILMN_3310221	MIR130B	MIR130B	MIR130B	MIR130B	hsa-mir-130b	hsa-mir-130b	3.05e-01	1.06113
ILMN_1779373	HIST1H2BF	AL031777.2	AL031777.2	HIST1H2BF/AL031777.2			3.11e-01	1.06091
ILMN_3308103	MIR1321	MIR1321	MIR1321	MIR1321			2.59e-01	1.06076
ILMN_3311020	MIR208A	MIR208A	MIR208A	MIR208A			2.09e-01	1.06076
ILMN_1782167	RPL32	AC034198.1	AC034198.1	RPL32/AC034198.1			4.68e-01	1.06032
ILMN_3310276	MIR425	MIR191	MIR425	MIR425			3.40e-01	1.05988
ILMN_3308048	MIR193B	MIR193B	MIR193B	MIR193B	hsa-mir-193b	hsa-mir-193b	2.47e-01	1.05966
ILMN_3309123	MIR543	MIR543	MIR543	MIR543			2.58e-01	1.05937
ILMN_3309244	MIR1271	MIR1271	MIR1271	MIR1271	hsa-mir-1271	hsa-mir-1271	3.19e-01	1.05885
ILMN_3310446	MIR217	MIR217	MIR217	MIR217			3.41e-01	1.05834
ILMN_3271872	LOC100130112	MIR365B	MIR365B	LOC100130112/MIR365B	hsa-mir-365b	hsa-mir-365b	4.27e-01	1.05812
ILMN_1781257	LOC728193	AC104066.1	AC104066.1	LOC728193/AC104066.1			3.26e-01	1.05709
ILMN_3309379	MIR2052	MIR2052	MIR2052	MIR2052			1.92e-01	1.05687
ILMN_1917257	HS.538780	MIR4491	MIR4491	HS.538780/MIR4491	hsa-mir-4491		5.10e-01	1.05658
ILMN_3310730	MIR1277	MIR1277	MIR1277	MIR1277			3.92e-01	1.05651
ILMN_3310955	MIR758	MIR758	MIR758	MIR758	hsa-mir-758	hsa-mir-758	2.83e-01	1.05629
ILMN_3310426	MIR298	MIR298	MIR298	MIR298	hsa-mir-298		2.14e-01	1.05607
ILMN_1882512	HS.406790	MIR3142HG	MIR3142HG	HS.406790/MIR3142HG			4.80e-01	1.05585
ILMN_3309054	MIR2053	MIR2053	MIR2053	MIR2053	hsa-mir-2053		2.33e-01	1.05468
ILMN_3309319	MIR92B	MIR92B	MIR92B	MIR92B			4.32e-01	1.05438
ILMN_3309904	MIR1202	MIR1202	MIR1202	MIR1202	hsa-mir-1202		3.99e-01	1.05438
ILMN_3309764	MIR485	AL132709.5	MIR485	MIR485/AL132709.5			4.93e-01	1.05431
ILMN_3308612	MIR149	MIR149	MIR149	MIR149	hsa-mir-149	hsa-mir-149	4.31e-01	1.05373
ILMN_3308946	MIR101-2	MIR101-2	MIR101-2	MIR101-2			4.05e-01	1.05322
ILMN_1739076	HIST1H2BO	Z98744.3	Z98744.3	HIST1H2BO/Z98744.3			3.89e-01	1.053
ILMN_3310860	MIR581	MIR581	MIR581	MIR581	hsa-mir-581		3.33e-01	1.05234
ILMN_2136133	PABPC1	MIR7705	MIR7705	PABPC1/MIR7705	hsa-mir-7705		8.06e-01	1.05227
ILMN_3309579	MIR301B	MIR301B	MIR301B	MIR301B	hsa-mir-301b	hsa-mir-301b	3.87e-01	1.0519
ILMN_3310386	MIR345	MIR345	MIR345	MIR345	hsa-mir-345	hsa-mir-345	5.71e-01	1.05074
ILMN_3308906	MIR192	MIR192	MIR192	MIR192			3.86e-01	1.05023
ILMN_1661076	WFDC10B	MIR3617	MIR3617	WFDC10B/MIR3617	hsa-mir-3617		4.57e-01	1.04993
ILMN_3308350	MIR548E	MIR548E	MIR548E	MIR548E	hsa-mir-548e	hsa-mir-548e	4.60e-01	1.04877
ILMN_3310770	MIR2114	MIR2114	MIR2114	MIR2114			3.98e-01	1.04812
ILMN_2188451	HIST1H2AH	MIR3143	MIR3143	HIST1H2AH/MIR3143	hsa-mir-3143		4.27e-01	1.04804
ILMN_3269119	LOC100130155	MIR124-2HG	MIR124-2HG	LOC100130155/MIR124-2HG			5.27e-01	1.04804
ILMN_1808587	ZFHX3	AC004943.1	AC004943.1	ZFHX3/AC004943.1			7.93e-01	1.04739
ILMN_3309419	MIR1281	MIR1281	MIR1281	MIR1281	hsa-mir-1281		4.65e-01	1.04732
ILMN_3310518	MIR601	MIR601	MIR601	MIR601	hsa-mir-601		2.91e-01	1.0471
ILMN_3206352	LOC728264	MIR143HG	MIR143HG	LOC728264/MIR143HG			4.10e-01	1.04688
ILMN_3308058	MIR887	MIR887	MIR887	MIR887			3.22e-01	1.04688
ILMN_3308931	MIR1225	MIR1225	MIR1225	MIR1225	hsa-mir-1225		3.79e-01	1.04601
ILMN_3309549	MIR206	MIR206	MIR206	MIR206			5.26e-01	1.04507
ILMN_3309184	MIR920	MIR920	MIR920	MIR920	hsa-mir-920		2.78e-01	1.04493
ILMN_3308597	MIR214	MIR214	MIR214	MIR214	hsa-mir-214		6.03e-01	1.04456
ILMN_1718542	LOC643430	AC022819.1	LOC643430	LOC643430/AC022819.1			3.92e-01	1.04413
ILMN_3308010	MIR770	MIR770	MIR770	MIR770	hsa-mir-770		3.65e-01	1.04413
ILMN_3309539	MIR374B	MIR421	MIR374B	MIR374B/MIR421			3.73e-01	1.04398
ILMN_3308215	MIR596	MIR596	MIR596	MIR596	hsa-mir-596		5.36e-01	1.04377
ILMN_1652998	HIST1H2BL	AL009179.1	HIST1H2BL	HIST1H2BL/AL009179.1			3.87e-01	1.04297
ILMN_1708510	NFATC2IP	MIR4517	MIR4517	NFATC2IP/MIR4517	hsa-mir-4517		5.87e-01	1.0429
ILMN_3309099	MIR320A	MIR320A	MIR320A	MIR320A	hsa-mir-320a		4.44e-01	1.04283
ILMN_3308602	MIR576	MIR576	MIR576	MIR576	hsa-mir-576	hsa-mir-576	4.01e-01	1.04268
ILMN_3309041	MIR1237	MIR1237	MIR1237	MIR1237	hsa-mir-1237		3.59e-01	1.04268
ILMN_1696120	EIF4E	AC019131.1	AC019131.1	EIF4E/AC019131.1			4.60e-01	1.04261
ILMN_3308991	MIR1302-7	MIR1302-7	MIR1302-7	MIR1302-7			4.33e-01	1.04254
ILMN_3309719	MIR628	MIR628	MIR628	MIR628			5.64e-01	1.04239
ILMN_3310648	MIR7-2	MIR7-2	MIR7-2	MIR7-2	hsa-mir-7-2		4.03e-01	1.04232
ILMN_3239603	LOC727967	MIR7112	MIR7112	LOC727967/MIR7112	hsa-mir-7112		5.16e-01	1.0421
ILMN_3309524	MIR122	MIR122	MIR122	MIR122			4.47e-01	1.04203
ILMN_3301319	LOC729296	MIR646HG	MIR646HG	LOC729296/MIR646HG			5.37e-01	1.04196
ILMN_3309869	MIR504	MIR504	MIR504	MIR504			4.19e-01	1.04196
ILMN_3308843	MIR548I2	MIR548I2	MIR548I2	MIR548I2	hsa-mir-548i-2		4.32e-01	1.04174
ILMN_3309614	MIR1-1	MIR1-1	MIR1-1	MIR1-1	hsa-mir-1-1	hsa-mir-1-1	4.37e-01	1.04174
ILMN_3310118	MIR761	MIR761	MIR761	MIR761			5.31e-01	1.04167
ILMN_3308743	MIR125B2	MIR125B2	MIR125B2	MIR125B2	hsa-mir-125b-2	hsa-mir-125b-2	5.62e-01	1.04023
ILMN_3308480	MIR497	MIR497	MIR497	MIR497	hsa-mir-497	hsa-mir-497	5.37e-01	1.04001
ILMN_3308833	MIR154	MIR154	MIR154	MIR154	hsa-mir-154	hsa-mir-154	5.17e-01	1.03929
ILMN_3308200	MIR583	MIR583	MIR583	MIR583	hsa-mir-583		5.02e-01	1.03915
ILMN_3308575	MIR382	MIR382	MIR382	MIR382			5.38e-01	1.03886
ILMN_3309939	MIR302F	MIR302F	MIR302F	MIR302F			5.07e-01	1.03886
ILMN_1890741	HS.552561	AC068587.2	AC068587.2	HS.552561/AC068587.2			6.12e-01	1.03879
ILMN_1688434	LOC440013	AL732375.5	LOC440013	LOC440013/AL732375.5			4.98e-01	1.03872
ILMN_3308956	MIR371	MIR372	MIR371	MIR371/MIR372	hsa-mir-372		5.12e-01	1.03864
ILMN_3310376	MIR218-2	MIR218-2	MIR218-2	MIR218-2	hsa-mir-218-2		6.08e-01	1.03821
ILMN_3309249	MIR1178	MIR1178	MIR1178	MIR1178	hsa-mir-1178		6.04e-01	1.03807
ILMN_3308250	MIR548H4	MIR548H4	MIR548H4	MIR548H4	hsa-mir-548h-4	hsa-mir-548h-4	5.88e-01	1.03778
ILMN_1710989	LOC653061	AC100756.1	AC100756.1	LOC653061/AC100756.1			7.46e-01	1.03749
ILMN_3309294	MIR2278	MIR2278	MIR2278	MIR2278	hsa-mir-2278		5.97e-01	1.03749
ILMN_3309284	MIR137	MIR137	MIR137	MIR137	hsa-mir-137		4.77e-01	1.03742
ILMN_3310980	MIR326	MIR326	MIR326	MIR326	hsa-mir-326		6.38e-01	1.03735
ILMN_3310700	MIR1205	MIR1205	MIR1205	MIR1205	hsa-mir-1205		5.66e-01	1.0372
ILMN_3310523	MIR381	MIR381	MIR381	MIR381			4.57e-01	1.03706
ILMN_3310588	MIR623	MIR623	MIR623	MIR623	hsa-mir-623		4.77e-01	1.03684
ILMN_1658243	PSD3	AC090420.1	AC090420.1	PSD3/AC090420.1			6.15e-01	1.0367
ILMN_3309980	MIR548B	MIR548B	MIR548B	MIR548B	hsa-mir-548b		6.13e-01	1.03656
ILMN_3308668	MIR548H3	MIR548H3	MIR548H3	MIR548H3	hsa-mir-548h-3		3.65e-01	1.03605
ILMN_3309669	MIR544	MIR544A	MIR544	MIR544/MIR544A	hsa-mir-544a		5.83e-01	1.03548
ILMN_3310256	MIR323	MIR323A	MIR323	MIR323/MIR323A			4.84e-01	1.03534
ILMN_3227255	LOC728477	AC091167.1	LOC728477	LOC728477/AC091167.1			6.16e-01	1.03476
ILMN_1743246	LOC644929	MIR34AHG	MIR34AHG	LOC644929/MIR34AHG			5.93e-01	1.03469
ILMN_1726505	GOLGA2L1	AC010203.1	AC010203.1	GOLGA2L1/AC010203.1			6.59e-01	1.03433
ILMN_3216382	LOC100133224	MIR3928	MIR3928	LOC100133224/MIR3928	hsa-mir-3928		4.87e-01	1.03376
ILMN_3311095	MIR643	MIR643	MIR643	MIR643	hsa-mir-643		5.75e-01	1.03347
ILMN_1670185	SSH3	AP001885.1	AP001885.1	SSH3/AP001885.1			6.41e-01	1.03311
ILMN_3308148	MIR612	MIR612	MIR612	MIR612	hsa-mir-612		6.37e-01	1.03304
ILMN_3311065	MIR152	MIR152	MIR152	MIR152			6.08e-01	1.03304
ILMN_3308245	MIR524	MIR524	MIR524	MIR524			5.55e-01	1.03297
ILMN_3310935	MIR450B	MIR450A2	MIR450B	MIR450B/MIR450A2			5.92e-01	1.03297
ILMN_3239625	LOC641367	AC092364.1	LOC641367	LOC641367/AC092364.1			7.38e-01	1.03254
ILMN_3309799	MIR569	MIR569	MIR569	MIR569	hsa-mir-569		5.69e-01	1.03247
ILMN_3310103	MIR875	MIR599	MIR875	MIR875/MIR599	hsa-mir-599		4.49e-01	1.03226
ILMN_1714218	LOC646631	MIR4505	MIR4505	LOC646631/MIR4505	hsa-mir-4505		5.48e-01	1.03183
ILMN_3310093	MIR1288	MIR1288	MIR1288	MIR1288	hsa-mir-1288		5.92e-01	1.03183
ILMN_1697701	PLEKHJ1	MIR1227	MIR1227	PLEKHJ1/MIR1227	hsa-mir-1227		8.04e-01	1.03161
ILMN_3308748	MIR346	MIR346	MIR346	MIR346	hsa-mir-346		6.45e-01	1.03075
ILMN_1909183	HS.290834	MIR4736	MIR4736	HS.290834/MIR4736	hsa-mir-4736		6.39e-01	1.03054
ILMN_3311060	MIR375	MIR375	MIR375	MIR375			6.01e-01	1.03047
ILMN_1664601	LOC648763	MIR572	MIR572	LOC648763/MIR572	hsa-mir-572		6.07e-01	1.03011
ILMN_1861982	HS.166545	MIR30C2	MIR30C2	HS.166545/MIR30C2			6.21e-01	1.02968
ILMN_3309289	MIR181A1	MIR181A1	MIR181A1	MIR181A1	hsa-mir-181a-1	hsa-mir-181a-1	6.46e-01	1.02933
ILMN_1759913	LOC642587	MIR205HG	MIR205HG	LOC642587/MIR205HG			7.28e-01	1.02918
ILMN_2044927	RNF5	MIR6833	MIR6833	RNF5/MIR6833	hsa-mir-6833		8.90e-01	1.02918
ILMN_3311010	MIR15B	MIR16-2	MIR15B	MIR15B/MIR16-2	hsa-mir-16-2	hsa-mir-16-2	5.94e-01	1.02911
ILMN_3308808	MIR130A	MIR130A	MIR130A	MIR130A	hsa-mir-130a		8.81e-01	1.02904
ILMN_3309174	MIR191	MIR191	MIR191	MIR191			6.47e-01	1.02897
ILMN_3310690	MIR510	MIR510	MIR510	MIR510	hsa-mir-510	hsa-mir-510	7.26e-01	1.02876
ILMN_3309339	MIR100	MIR100	MIR100	MIR100	hsa-mir-100	hsa-mir-100	7.09e-01	1.02819
ILMN_3308911	MIR128-2	MIR128-2	MIR128-2	MIR128-2	hsa-mir-128-2	hsa-mir-128-2	6.68e-01	1.02754
ILMN_3310421	MIR1292	MIR1292	MIR1292	MIR1292	hsa-mir-1292		6.76e-01	1.02719
ILMN_3309814	MIR208B	MIR208B	MIR208B	MIR208B	hsa-mir-208b	hsa-mir-208b	6.97e-01	1.02697
ILMN_3308205	MIR1179	MIR1179	MIR1179	MIR1179			6.54e-01	1.02683
ILMN_3309463	MIR380	AL132709.2	MIR380	MIR380/AL132709.2			6.76e-01	1.02598
ILMN_3309914	MIR660	MIR660	MIR660	MIR660			6.86e-01	1.02591
ILMN_3310201	MIR181C	MIR181D	MIR181C	MIR181C/MIR181D	hsa-mir-181d	hsa-mir-181d	7.16e-01	1.02584
ILMN_2152131	ACTB	AC006483.1	AC006483.1	ACTB/AC006483.1			2.69e-01	1.02576
ILMN_3309599	MIR211	MIR211	MIR211	MIR211	hsa-mir-211	hsa-mir-211	6.87e-01	1.02569
ILMN_3310236	MIR199A1	MIR199A1	MIR199A1	MIR199A1	hsa-mir-199a-1	hsa-mir-199a-1	6.17e-01	1.02569
ILMN_3308270	MIR1280	MIR1280	MIR1280	MIR1280			6.48e-01	1.02555
ILMN_3308540	MIR548I1	AC090954.1	MIR548I1	MIR548I1/AC090954.1			7.03e-01	1.02541
ILMN_3308360	MIR636	MIR636	MIR636	MIR636	hsa-mir-636		7.02e-01	1.02527
ILMN_3311090	MIR551B	MIR551B	MIR551B	MIR551B	hsa-mir-551b	hsa-mir-551b	6.29e-01	1.02456
ILMN_3308622	MIR1908	MIR1908	MIR1908	MIR1908	hsa-mir-1908	hsa-mir-1908	6.70e-01	1.02441
ILMN_3300937	MIRH1	MIR17HG	MIR17HG	MIRH1/MIR17HG			6.66e-01	1.02434
ILMN_3310196	MIR1302-5	MIR1302-5	MIR1302-5	MIR1302-5	hsa-mir-1302-5		7.49e-01	1.02427
ILMN_3310845	MIR511-2	MIR511	MIR511-2	MIR511-2/MIR511	hsa-mir-511		6.96e-01	1.0242
ILMN_3309504	MIR96	MIR96	MIR96	MIR96	hsa-mir-96	hsa-mir-96	7.12e-01	1.02413
ILMN_3308173	MIR328	MIR328	MIR328	MIR328			7.27e-01	1.02399
ILMN_3309438	MIR372	MIR372	MIR372	MIR372	hsa-mir-372		7.26e-01	1.02399
ILMN_3310098	MIR938	MIR938	MIR938	MIR938	hsa-mir-938		7.60e-01	1.02349
ILMN_3310578	MIR548Q	MIR548Q	MIR548Q	MIR548Q	hsa-mir-548q		7.26e-01	1.02349
ILMN_1800853	LOC652880	AP000781.1	LOC652880	LOC652880/AP000781.1			7.56e-01	1.02307
ILMN_3309329	MIR885	MIR885	MIR885	MIR885			7.64e-01	1.02307
ILMN_3308410	MIR451	MIR4732	MIR451	MIR451/MIR4732	hsa-mir-4732		7.10e-01	1.02292
ILMN_3310316	MIR1324	MIR1324	MIR1324	MIR1324	hsa-mir-1324		7.57e-01	1.02292
ILMN_3308280	MIR582	MIR582	MIR582	MIR582			6.97e-01	1.02285
ILMN_1654394	LOC648576	AC137723.1	LOC648576	LOC648576/AC137723.1			7.23e-01	1.02271
ILMN_3308708	MIR1245	MIR1245A	MIR1245	MIR1245/MIR1245A	hsa-mir-1245a		7.89e-01	1.02264
ILMN_1909542	HS.197670	MIR708	MIR708	HS.197670/MIR708	hsa-mir-708	hsa-mir-708	7.60e-01	1.0225
ILMN_3309299	MIR559	MIR559	MIR559	MIR559	hsa-mir-559		7.41e-01	1.02193
ILMN_3310186	MIR106B	MIR106B	MIR106B	MIR106B	hsa-mir-106b	hsa-mir-106b	6.95e-01	1.02193
ILMN_3308652	MIR561	MIR561	MIR561	MIR561	hsa-mir-561	hsa-mir-561	7.99e-01	1.02165
ILMN_3310261	MIR491	MIR491	MIR491	MIR491			6.96e-01	1.02158
ILMN_3308565	MIR218-1	MIR218-1	MIR218-1	MIR218-1	hsa-mir-218-1	hsa-mir-218-1	7.01e-01	1.02151
ILMN_3310431	MIR874	MIR874	MIR874	MIR874			7.81e-01	1.02151
ILMN_1713320	LOC642453	MIR6779	MIR6779	LOC642453/MIR6779	hsa-mir-6779		7.74e-01	1.0213
ILMN_3310755	MIR197	MIR197	MIR197	MIR197	hsa-mir-197	hsa-mir-197	6.57e-01	1.02108
ILMN_3309399	MIR609	MIR609	MIR609	MIR609	hsa-mir-609		6.93e-01	1.02094
ILMN_3308921	MIR34B	MIR34B	MIR34B	MIR34B			7.22e-01	1.02087
ILMN_3308093	MIR26B	MIR26B	MIR26B	MIR26B			7.74e-01	1.0208
ILMN_3310206	MIR362	MIR362	MIR362	MIR362	hsa-mir-362	hsa-mir-362	6.76e-01	1.02073
ILMN_3280792	LOC728196	MIR34C	MIR34C	LOC728196/MIR34C			7.02e-01	1.01946
ILMN_3309158	MIR521-2	MIR521-1	MIR521-2	MIR521-2/MIR521-1	hsa-mir-521-1		7.94e-01	1.01946
ILMN_1722640	LOC284801	MIR663AHG	MIR663AHG	LOC284801/MIR663AHG			7.96e-01	1.01932
ILMN_1806813	LOC653543	AC126281.3	LOC653543	LOC653543/AC126281.3			7.95e-01	1.01924
ILMN_3309364	MIR320B1	MIR320B1	MIR320B1	MIR320B1	hsa-mir-320b-1		7.59e-01	1.01889
ILMN_3309649	MIR1226	MIR1226	MIR1226	MIR1226	hsa-mir-1226		7.47e-01	1.01882
ILMN_3310865	MIR125A	MIRLET7E	MIR125A	MIR125A/MIRLET7E			7.17e-01	1.01882
ILMN_1803907	HOXC5	MIR615	MIR615	HOXC5/MIR615	hsa-mir-615	hsa-mir-615	7.73e-01	1.01875
ILMN_3308210	MIR195	MIR497	MIR195	MIR195	hsa-mir-497	hsa-mir-497	8.25e-01	1.01861
ILMN_3308520	MIR1231	MIR1231	MIR1231	MIR1231	hsa-mir-1231		7.59e-01	1.01854
ILMN_3309199	MIR181B1	MIR181A1	MIR181B1	MIR181B1/MIR181A1	hsa-mir-181a-1	hsa-mir-181a-1	7.47e-01	1.01854
ILMN_3310161	MIR627	MIR627	MIR627	MIR627	hsa-mir-627	hsa-mir-627	7.86e-01	1.0184
ILMN_3308545	MIR1243	MIR1243	MIR1243	MIR1243			8.08e-01	1.01819
ILMN_3309659	MIR181A2	MIR181A2	MIR181A2	MIR181A2	hsa-mir-181a-2		7.89e-01	1.0179
ILMN_3236458	AK2P2	AL121652.3	AL121652.3	AK2P2/AL121652.3			8.82e-01	1.01776
ILMN_3310436	MIR567	MIR567	MIR567	MIR567	hsa-mir-567		7.79e-01	1.01762
ILMN_3310504	MIR651	MIR651	MIR651	MIR651			8.02e-01	1.01734
ILMN_3308607	MIR607	MIR607	MIR607	MIR607	hsa-mir-607		8.83e-01	1.01699
ILMN_3309609	MIR486	AC113133.1	MIR486	MIR486/AC113133.1			7.63e-01	1.01699
ILMN_3310528	MIR1264	AC233299.2	MIR1264	MIR1264/AC233299.2			7.72e-01	1.01699
ILMN_3310815	MIR30C1	MIR30C1	MIR30C1	MIR30C1	hsa-mir-30c-1	hsa-mir-30c-1	7.92e-01	1.01692
ILMN_1745271	EXOSC4	MIR6847	MIR6847	EXOSC4/MIR6847	hsa-mir-6847		9.60e-01	1.01685
ILMN_3310291	MIR645	MIR645	MIR645	MIR645	hsa-mir-645		8.35e-01	1.01663
ILMN_3308260	MIR148B	MIR148B	MIR148B	MIR148B	hsa-mir-148b	hsa-mir-148b	7.99e-01	1.01656
ILMN_3309309	MIR1302-4	MIR1302-4	MIR1302-4	MIR1302-4	hsa-mir-1302-4		7.52e-01	1.01649
ILMN_3308560	MIR132	MIR212	MIR132	MIR132/MIR212	hsa-mir-212		7.61e-01	1.01628
ILMN_3309639	MIR487A	MIR487A	MIR487A	MIR487A			8.60e-01	1.01628
ILMN_3309119	MIR1308	MIR1308	MIR1308	MIR1308			8.16e-01	1.01614
ILMN_1750508	STMN1	MIR3917	MIR3917	STMN1/MIR3917	hsa-mir-3917		8.27e-01	1.01593
ILMN_3308390	MIR892B	MIR892B	MIR892B	MIR892B	hsa-mir-892b		8.34e-01	1.01572
ILMN_1678695	RBBP8	MIR4741	MIR4741	RBBP8/MIR4741	hsa-mir-4741		7.89e-01	1.01551
ILMN_3306959	FLJ38723	AC126323.1	AC126323.1	FLJ38723/AC126323.1			7.68e-01	1.01544
ILMN_3311055	MIR1257	MIR1257	MIR1257	MIR1257	hsa-mir-1257		8.28e-01	1.01544
ILMN_3310075	MIR1297	MIR1297	MIR1297	MIR1297			7.48e-01	1.01537
ILMN_3310025	MIR2117	MIR2117	MIR2117	MIR2117	hsa-mir-2117		8.38e-01	1.01508
ILMN_3310685	MIR190B	MIR190B	MIR190B	MIR190B			7.59e-01	1.01501
ILMN_3310910	MIR29A	MIR29A	MIR29A	MIR29A			7.86e-01	1.0148
ILMN_3309031	MIR27A	MIR27A	MIR27A	MIR27A	hsa-mir-27a	hsa-mir-27a	8.33e-01	1.01459
ILMN_3309859	MIR1197	MIR323A	MIR1197	MIR1197/MIR323A			8.31e-01	1.01459
ILMN_3309754	MIR199A2	MIR199A2	MIR199A2	MIR199A2	hsa-mir-199a-2	hsa-mir-199a-2	8.47e-01	1.01445
ILMN_3309950	MIR644	MIR644A	MIR644	MIR644/MIR644A	hsa-mir-644a		8.24e-01	1.01417
ILMN_3309864	MIR449B	MIR449B	MIR449B	MIR449B	hsa-mir-449b		8.29e-01	1.01396
ILMN_3310800	MIR367	MIR302B	MIR367	MIR367/MIR302B	hsa-mir-302b		8.52e-01	1.01389
ILMN_1833415	LOC730877	MIR34C	MIR34C	LOC730877/MIR34C			8.68e-01	1.01382
ILMN_3308530	MIR766	MIR766	MIR766	MIR766	hsa-mir-766	hsa-mir-766	8.18e-01	1.01375
ILMN_1754441	LOC390205	MIR4488	MIR4488	LOC390205/MIR4488	hsa-mir-4488		8.35e-01	1.01368
ILMN_3308500	MIR611	MIR611	MIR611	MIR611	hsa-mir-611		8.15e-01	1.01354
ILMN_3309724	MIR509-2	MIR509-2	MIR509-2	MIR509-2	hsa-mir-509-2	hsa-mir-509-2	8.32e-01	1.01354
ILMN_3310231	MIR555	MIR555	MIR555	MIR555	hsa-mir-555		8.70e-01	1.01347
ILMN_3308866	MIR181B2	MIR181B2	MIR181B2	MIR181B2	hsa-mir-181b-2	hsa-mir-181b-2	8.66e-01	1.0134
ILMN_1660754	C13ORF25	MIR17HG	MIR17HG	C13ORF25/MIR17HG			8.99e-01	1.01319
ILMN_1736820	HIST1H2BM	AL049822.1	AL049822.1	HIST1H2BM/AL049822.1			8.94e-01	1.01284
ILMN_3308673	MIR624	MIR624	MIR624	MIR624	hsa-mir-624	hsa-mir-624	8.35e-01	1.0127
ILMN_3309224	MIR23A	MIR27A	MIR23A	MIR23A	hsa-mir-27a	hsa-mir-27a	8.74e-01	1.01248
ILMN_3308020	MIR548J	MIR548J	MIR548J	MIR548J	hsa-mir-548j	hsa-mir-548j	8.65e-01	1.01241
ILMN_3308490	MIR564	MIR564	MIR564	MIR564	hsa-mir-564		9.00e-01	1.01227
ILMN_1697767	LOC254559	MIR9-3HG	MIR9-3HG	LOC254559/MIR9-3HG			8.63e-01	1.01178
ILMN_3310060	MIR541	MIR541	MIR541	MIR541	hsa-mir-541		8.71e-01	1.01178
ILMN_3308853	MIR924	MIR924	MIR924	MIR924			8.33e-01	1.01171
ILMN_3309934	MIR184	MIR184	MIR184	MIR184	hsa-mir-184		8.59e-01	1.01164
ILMN_3310346	MIR141	MIR200C	MIR141	MIR141/MIR200C			8.51e-01	1.0115
ILMN_1681678	CTDSP1	MIR26B	MIR26B	CTDSP1/MIR26B			9.31e-01	1.01136
ILMN_3310925	MIR633	MIR633	MIR633	MIR633	hsa-mir-633		8.75e-01	1.01122
ILMN_3176894	LOC100130743	AC127526.1	LOC100130743	LOC100130743/AC127526.1			8.98e-01	1.01108
ILMN_3310750	MIR657	MIR657	MIR657	MIR657	hsa-mir-657		9.05e-01	1.01094
ILMN_3310286	MIR891B	MIR891B	MIR891B	MIR891B	hsa-mir-891b		8.74e-01	1.0108
ILMN_3310820	MIR603	MIR603	MIR603	MIR603	hsa-mir-603		8.92e-01	1.01052
ILMN_3309679	MIR297	MIR297	MIR297	MIR297	hsa-mir-297		8.87e-01	1.01024
ILMN_3310548	MIR889	MIR539	MIR889	MIR889			8.68e-01	1.01024
ILMN_3310141	MIR16-2	MIR16-2	MIR16-2	MIR16-2	hsa-mir-16-2	hsa-mir-16-2	9.02e-01	1.01003
ILMN_3310985	MIR26A1	MIR26A1	MIR26A1	MIR26A1	hsa-mir-26a-1	hsa-mir-26a-1	8.92e-01	1.00975
ILMN_3309704	MIR890	MIR888	MIR890	MIR890/MIR888	hsa-mir-888		8.94e-01	1.00961
ILMN_2278512	NFATC2IP	MIR4517	MIR4517	NFATC2IP/MIR4517	hsa-mir-4517		9.23e-01	1.00947
ILMN_3309344	MIR640	MIR640	MIR640	MIR640	hsa-mir-640		9.23e-01	1.00947
ILMN_3309674	MIR376A2	AL132709.3	MIR376A2	MIR376A2/AL132709.3			8.72e-01	1.00947
ILMN_3308525	MIR30A	MIR30A	MIR30A	MIR30A	hsa-mir-30a	hsa-mir-30a	9.13e-01	1.0094
ILMN_3309569	MIR30E	MIR30E	MIR30E	MIR30E			8.93e-01	1.00898
ILMN_3310780	MIR602	MIR602	MIR602	MIR602	hsa-mir-602		8.91e-01	1.00884
ILMN_1764986	HIST3H2BB	AL139288.1	AL139288.1	HIST3H2BB/AL139288.1			8.97e-01	1.00856
ILMN_3310406	MIR449C	MIR449C	MIR449C	MIR449C	hsa-mir-449c		9.16e-01	1.00842
ILMN_3308981	MIR26A2	MIR26A2	MIR26A2	MIR26A2	hsa-mir-26a-2	hsa-mir-26a-2	9.20e-01	1.00807
ILMN_3290470	LOC442249	AL365214.1	LOC442249	LOC442249/AL365214.1			9.15e-01	1.008
ILMN_3308083	MIR589	MIR589	MIR589	MIR589	hsa-mir-589	hsa-mir-589	9.34e-01	1.00786
ILMN_3308078	MIR31	MIR31	MIR31	MIR31	hsa-mir-31	hsa-mir-31	8.92e-01	1.00772
ILMN_3309804	MIR424	MIR424	MIR424	MIR424			9.08e-01	1.00765
ILMN_3309094	MIR1278	MIR1278	MIR1278	MIR1278	hsa-mir-1278	hsa-mir-1278	9.13e-01	1.00716
ILMN_3310171	MIR210	MIR210	MIR210	MIR210	hsa-mir-210	hsa-mir-210	9.28e-01	1.00703
ILMN_3309729	MIR1261	MIR1261	MIR1261	MIR1261	hsa-mir-1261		9.26e-01	1.00687
ILMN_3308966	MIR1910	MIR1910	MIR1910	MIR1910			9.13e-01	1.00674
ILMN_3310000	MIR369	MIR369	MIR369	MIR369	hsa-mir-369	hsa-mir-369	9.57e-01	1.00668
ILMN_3308240	MIR764	MIR764	MIR764	MIR764	hsa-mir-764		9.12e-01	1.00666
ILMN_3309619	MIR499	MIR499A	MIR499	MIR499/MIR499A	hsa-mir-499a		9.31e-01	1.00654
ILMN_3308255	MIR33A	MIR33A	MIR33A	MIR33A	hsa-mir-33a	hsa-mir-33a	9.28e-01	1.0064
ILMN_3310045	MIR410	MIR369	MIR410	MIR410/MIR369	hsa-mir-369	hsa-mir-369	9.08e-01	1.00635
ILMN_3308190	MIR641	MIR641	MIR641	MIR641	hsa-mir-641		9.30e-01	1.00632
ILMN_3308128	MIR129-1	MIR129-1	MIR129-1	MIR129-1	hsa-mir-129-1	hsa-mir-129-1	9.34e-01	1.00628
ILMN_3308005	MIR449A	MIR449B	MIR449A	MIR449A/MIR449B	hsa-mir-449b		9.27e-01	1.00622
ILMN_3309554	MIR632	MIR632	MIR632	MIR632	hsa-mir-632		9.45e-01	1.00619
ILMN_1672108	LOC388161	AC243562.2	LOC388161	LOC388161/AC243562.2			9.32e-01	1.00577
ILMN_3308470	MIR655	MIR655	MIR655	MIR655	hsa-mir-655		9.25e-01	1.00567
ILMN_3308430	MIR493	MIR493	MIR493	MIR493			9.14e-01	1.0055
ILMN_3310915	MIR891A	MIR891A	MIR891A	MIR891A	hsa-mir-891a		9.46e-01	1.00532
ILMN_3310246	MIR506	MIR506	MIR506	MIR506	hsa-mir-506	hsa-mir-506	9.43e-01	1.00525
ILMN_3308986	MIR1272	MIR1272	MIR1272	MIR1272	hsa-mir-1272		9.40e-01	1.00521
ILMN_3308823	MIR302A	MIR302B	MIR302A	MIR302A/MIR302B	hsa-mir-302b		9.48e-01	1.00428
ILMN_3308647	MIR532	MIR532	MIR532	MIR532			9.55e-01	1.00426
ILMN_3309560	MIR182	MIR182	MIR182	MIR182	hsa-mir-182	hsa-mir-182	9.62e-01	1.0042
ILMN_3310514	MIR639	MIR639	MIR639	MIR639	hsa-mir-639		9.65e-01	1.0042
ILMN_3309314	MIR588	MIR588	MIR588	MIR588	hsa-mir-588		9.57e-01	1.00417
ILMN_3310136	MIR605	MIR605	MIR605	MIR605	hsa-mir-605		9.47e-01	1.00399
ILMN_3310875	MIR708	MIR708	MIR708	MIR708	hsa-mir-708	hsa-mir-708	9.62e-01	1.0037
ILMN_3308535	MIR1289-2	MIR1289-2	MIR1289-2	MIR1289-2	hsa-mir-1289-2		9.58e-01	1.00365
ILMN_3308290	MIR1470	MIR1470	MIR1470	MIR1470	hsa-mir-1470		9.74e-01	1.00354
ILMN_1893675	HS.195389	MIR373	MIR373	HS.195389/MIR373	hsa-mir-373		9.61e-01	1.00351
ILMN_3308723	MIR148A	MIR148A	MIR148A	MIR148A			9.50e-01	1.00348
ILMN_3308305	MIR15A	MIR16-1	MIR15A	MIR15A/MIR16-1	hsa-mir-16-1	hsa-mir-16-1	9.65e-01	1.00329
ILMN_3308043	MIR134	MIR134	MIR134	MIR134	hsa-mir-134	hsa-mir-134	9.72e-01	1.00309
ILMN_3310481	MIR658	MIR658	MIR658	MIR658	hsa-mir-658		9.78e-01	1.00287
ILMN_3308637	MIR630	MIR630	MIR630	MIR630	hsa-mir-630		9.73e-01	1.00283
ILMN_3310494	MIR138-2	MIR138-2	MIR138-2	MIR138-2			9.64e-01	1.00281
ILMN_3310795	MIR421	MIR421	MIR421	MIR421			9.81e-01	1.00223
ILMN_3309604	MIR769	MIR769	MIR769	MIR769	hsa-mir-769	hsa-mir-769	9.79e-01	1.00201
ILMN_3310945	MIR548F5	MIR548F5	MIR548F5	MIR548F5	hsa-mir-548f-5		9.78e-01	1.00168
ILMN_3310810	MIR483	MIR483	MIR483	MIR483			9.81e-01	1.00163
ILMN_2053178	ACTG1	AC139149.1	AC139149.1	ACTG1/AC139149.1			9.68e-01	1.00129
ILMN_3309844	MIR448	MIR448	MIR448	MIR448	hsa-mir-448		9.90e-01	1.00127
ILMN_3310990	MIR548F1	MIR548F1	MIR548F1	MIR548F1	hsa-mir-548f-1		9.89e-01	1.0012
ILMN_3310553	MIR548G	MIR548G	MIR548G	MIR548G	hsa-mir-548g		9.93e-01	1.00076
ILMN_3309924	MIR138-1	MIR138-1	MIR138-1	MIR138-1	hsa-mir-138-1	hsa-mir-138-1	9.93e-01	1.00051
ILMN_3310533	MIR759	MIR759	MIR759	MIR759	hsa-mir-759		9.96e-01	1.00039
ILMN_3310618	MIR188	MIR532	MIR188	MIR188/MIR532	hsa-mir-532	hsa-mir-532	9.98e-01	1.00011
ILMN_1652677	FAM89A	MIR1182	MIR1182	FAM89A/MIR1182	hsa-mir-1182		2.75e-04	-1.67018
ILMN_1654545	CPSF1	MIR939	MIR939	CPSF1/MIR939	hsa-mir-939		9.57e-01	-1.01614
ILMN_1660900	SNORA7B	AL449212.1	AL449212.1	SNORA7B/AL449212.1			4.92e-01	-1.09278
ILMN_1677834	LOC158257	MIRLET7DHG	MIRLET7DHG	LOC158257/MIRLET7DHG			9.25e-01	-1.00603
ILMN_1678242	LOC643446	MIR572	MIR572	LOC643446/MIR572	hsa-mir-572		7.01e-01	-1.03369
ILMN_1680757	LRRC26	MIR3621	MIR3621	LRRC26/MIR3621	hsa-mir-3621		5.74e-09	-3.91768
ILMN_1682463	LOC283174	MIR4697	MIR4697	LOC283174/MIR4697	hsa-mir-4697		5.39e-03	-1.15749
ILMN_1690703	C21ORF34	MIR99AHG	MIR99AHG	C21ORF34/MIR99AHG			1.47e-09	-2.65737
ILMN_1695422	NCL	AC017104.3	AC017104.3	NCL/AC017104.3			1.32e-04	-1.37936
ILMN_1696480	LOC730426	MIR1231	MIR1231	LOC730426/MIR1231	hsa-mir-1231		4.27e-01	-1.04377
ILMN_1702226	C21ORF34	MIR99AHG	MIR99AHG	C21ORF34/MIR99AHG			8.99e-08	-1.45801
ILMN_1703557	LOC440518	AC011467.1	AC011467.1	LOC440518/AC011467.1			7.50e-01	-1.01903
ILMN_1709256	PLEC1	MIR661	MIR661	PLEC1/MIR661	hsa-mir-661		4.86e-01	-1.05074
ILMN_1710075	FAM89A	MIR1182	MIR1182	FAM89A/MIR1182	hsa-mir-1182		1.01e-02	-1.42405
ILMN_1710406	PSMC1	AC096922.1	AC096922.1	PSMC1/AC096922.1			6.46e-01	-1.08073
ILMN_1712719	MAP7	AL023284.1	AL023284.1	MAP7/AL023284.1			2.99e-08	-2.71321
ILMN_1713189	C12ORF41	AC079951.1	AC079951.1	C12ORF41/AC079951.1			1.24e-02	-1.18509
ILMN_1715926	LOC642210	AC034198.1	LOC642210	LOC642210/AC034198.1			1.73e-01	-1.0372
ILMN_1716195	HIST1H2BG	AL031777.1	AL031777.1	HIST1H2BG/AL031777.1			2.07e-01	-1.17772
ILMN_1721225	C20ORF4	AL121895.1	AL121895.1	C20ORF4/AL121895.1			2.11e-01	-1.06703
ILMN_1726041	FLJ30092	MIR6861	MIR6861	FLJ30092/MIR6861	hsa-mir-6861		3.57e-01	-1.07177
ILMN_1730818	C19ORF30	MIR7-3HG	MIR7-3HG	C19ORF30/MIR7-3HG			6.84e-03	-1.45599
ILMN_1731248	LOC648705	MIR34AHG	MIR34AHG	LOC648705/MIR34AHG			3.26e-01	-1.11034
ILMN_1732291	LOC653125	AC139426.1	AC139426.1	LOC653125/AC139426.1			5.44e-01	-1.05907
ILMN_1738369	TUFM	MIR4721	MIR4721	TUFM/MIR4721	hsa-mir-4721		3.32e-01	-1.12506
ILMN_1739101	RBBP8	MIR4741	MIR4741	RBBP8/MIR4741	hsa-mir-4741		8.67e-01	-1.01868
ILMN_1756393	LOC90113	MIR1224	MIR1224	LOC90113/MIR1224	hsa-mir-1224		5.40e-01	-1.04247
ILMN_1756542	TBC1D17	MIR4750	MIR4750	TBC1D17/MIR4750	hsa-mir-4750		7.73e-01	-1.06209
ILMN_1765954	HSD17B3	AL160269.1	AL160269.1	HSD17B3/AL160269.1			9.30e-01	-1.00588
ILMN_1768018	LOC653543	AC126281.5	LOC653543	LOC653543/AC126281.5			8.53e-01	-1.01157
ILMN_1773313	USMG5	MIR1307	MIR1307	USMG5/MIR1307	hsa-mir-1307	hsa-mir-1307	1.27e-01	-1.67714
ILMN_1776076	POFUT1	MIR1825	MIR1825	POFUT1/MIR1825	hsa-mir-1825		1.62e-03	-1.24574
ILMN_1776079	CACNG8	MIR935	MIR935	CACNG8/MIR935	hsa-mir-935		5.94e-01	-1.04608
ILMN_1777487	ZNF839	AL137229.1	AL137229.1	ZNF839/AL137229.1			3.43e-01	-1.09733
ILMN_1782085	ATPBD4	MIR3942	MIR3942	ATPBD4/MIR3942	hsa-mir-3942		2.31e-01	-1.07923
ILMN_1782381	FLJ38723	AC126323.1	AC126323.1	FLJ38723/AC126323.1			1.24e-01	-1.05599
ILMN_1784428	MGC57346	AC126544.1	AC126544.1	MGC57346/AC126544.1			1.16e-07	-1.84933
ILMN_1789001	SLC35B2	MIR4647	MIR4647	SLC35B2/MIR4647	hsa-mir-4647		9.42e-01	-1.00968
ILMN_1792497	HRB	MIR5703	MIR5703	HRB/MIR5703	hsa-mir-5703		9.54e-01	-1.01946
ILMN_1795218	DHX30	MIR1226	MIR1226	DHX30/MIR1226	hsa-mir-1226		2.86e-01	-1.13761
ILMN_1798123	ELOVL1	MIR6734	MIR6734	ELOVL1/MIR6734	hsa-mir-6734		4.36e-04	-1.62676
ILMN_1800246	FLJ35409	MIR137HG	MIR137HG	FLJ35409/MIR137HG			5.46e-01	-1.03857
ILMN_1808907	HIST1H2BN	Z98744.1	Z98744.1	HIST1H2BN/Z98744.1			3.17e-01	-1.05702
ILMN_1809208	KIAA1543	MIR6792	MIR6792	KIAA1543/MIR6792	hsa-mir-6792		1.19e-09	-1.86736
ILMN_1815114	FLJ27365	MIRLET7BHG	MIRLET7BHG	FLJ27365/MIRLET7BHG			3.04e-03	-1.30134
ILMN_1840175	HS.7023	MIR124-2HG	MIR124-2HG	HS.7023/MIR124-2HG			4.89e-01	-1.045
ILMN_1859127	HS.190748	MIR193BHG	MIR193BHG	HS.190748/MIR193BHG			2.52e-04	-1.93992
ILMN_1904785	HS.436189	MIR296	MIR296	HS.436189/MIR296	hsa-mir-296	hsa-mir-296	3.83e-01	-1.06297
ILMN_1907042	HS.445414	MIR29C	MIR29C	HS.445414/MIR29C			9.12e-01	-1.01783
ILMN_2041222	FLJ40504	AC061975.1	AC061975.1	FLJ40504/AC061975.1			8.95e-06	-2.80889
ILMN_2041368	RN7SL1	AL139099.2	AL139099.2	RN7SL1/AL139099.2			4.98e-01	-1.02413
ILMN_2154566	RPL10A	MIR7111	MIR7111	RPL10A/MIR7111	hsa-mir-7111		5.45e-02	-1.07549
ILMN_2180315	ATG4D	MIR1238	MIR1238	ATG4D/MIR1238	hsa-mir-1238		5.04e-01	-1.04493
ILMN_2216815	MAP7	AL023284.1	AL023284.1	MAP7/AL023284.1			5.73e-08	-2.49666
ILMN_2249018	LOC389816	MIR3621	MIR3621	LOC389816/MIR3621	hsa-mir-3621		6.49e-09	-4.43828
ILMN_2273609	KIAA1543	MIR6792	MIR6792	KIAA1543/MIR6792	hsa-mir-6792		2.22e-04	-1.2466
ILMN_2276758	POFUT1	MIR1825	MIR1825	POFUT1/MIR1825	hsa-mir-1825		5.32e-01	-1.14472
ILMN_2278518	NFATC2IP	MIR4517	MIR4517	NFATC2IP/MIR4517	hsa-mir-4517		3.03e-01	-1.05453
ILMN_2283814	C21ORF34	MIR99AHG	MIR99AHG	C21ORF34/MIR99AHG			8.43e-01	-1.016
ILMN_2285817	FAM89A	MIR1182	MIR1182	FAM89A/MIR1182	hsa-mir-1182		3.39e-04	-1.69937
ILMN_2328986	SREBF1	MIR6777	MIR6777	SREBF1/MIR6777	hsa-mir-6777		4.17e-02	-1.30495
ILMN_2358652	NXF1	MIR6514	MIR6514	NXF1/MIR6514	hsa-mir-6514		9.91e-01	-1.00314
ILMN_2360401	LFNG	MIR4648	MIR4648	LFNG/MIR4648	hsa-mir-4648		5.37e-05	-1.17528
ILMN_2378048	HNRPK	MIR7-1	MIR7-1	HNRPK/MIR7-1	hsa-mir-7-1	hsa-mir-7-1	7.57e-01	-1.04717
ILMN_2390310	C17ORF91	MIR22HG	MIR22HG	C17ORF91/MIR22HG			2.51e-01	-1.232
ILMN_2403555	DHX30	MIR1226	MIR1226	DHX30/MIR1226	hsa-mir-1226		4.65e-01	-1.04804
ILMN_3175715	LOC100130098	MIR3150B	MIR3150B	LOC100130098/MIR3150B	hsa-mir-3150a		8.77e-01	-1.00933
ILMN_3178307	KRT18P28	AL450304.1	AL450304.1	KRT18P28/AL450304.1			3.10e-01	-1.06607
ILMN_3187508	KRT18P13	AL445531.1	AL445531.1	KRT18P13/AL445531.1			2.27e-01	-1.06142
ILMN_3188156	LOC100130155	MIR124-2HG	MIR124-2HG	LOC100130155/MIR124-2HG			5.11e-01	-1.03713
ILMN_3203360	LOC441736	AC107977.2	AC107977.2	LOC441736/AC107977.2			2.39e-01	-1.05914
ILMN_3205133	LOC728196	MIR34B	MIR34B	LOC728196/MIR34B			6.37e-01	-1.03161
ILMN_3208995	LOC653075	AC120045.1	AC120045.1	LOC653075/AC120045.1			5.87e-01	-1.05351
ILMN_3233071	LOC100128506	AC090954.1	LOC100128506	LOC100128506/AC090954.1			2.65e-01	-1.06452
ILMN_3235373	LOC100131930	AC023274.1	LOC100131930	LOC100131930/AC023274.1			6.26e-01	-1.03483
ILMN_3237446	SCARNA16	MIR6516	MIR6516	SCARNA16/MIR6516	hsa-mir-6516		7.07e-01	-1.05227
ILMN_3238707	SNORA8	AP001273.1	AP001273.1	SNORA8/AP001273.1			9.34e-01	-1.01466
ILMN_3238910	LOC653545	AL732375.5	LOC653545	LOC653545/AL732375.5			3.14e-01	-1.0549
ILMN_3240150	SNORA75	AC017104.3	AC017104.3	SNORA75/AC017104.3			6.45e-01	-1.03469
ILMN_3240231	SNORA34	AC079951.1	AC079951.1	SNORA34/AC079951.1			7.90e-01	-1.01586
ILMN_3241738	SNORD20	AC017104.3	AC017104.3	SNORD20/AC017104.3			6.19e-01	-1.02434
ILMN_3243639	LOC440014	AL732375.5	LOC440014	LOC440014/AL732375.5			8.60e-01	-1.0172
ILMN_3243644	LOC100132564	AC079949.1	LOC100132564	LOC100132564/AC079949.1			3.61e-03	-3.22657
ILMN_3243738	LOC728022	AL732375.5	LOC728022	LOC728022/AL732375.5			8.57e-01	-1.01558
ILMN_3243809	LOC728046	MIR8072	MIR8072	LOC728046/MIR8072	hsa-mir-8072		2.34e-01	-1.07773
ILMN_3244216	SCARNA3	AL590723.1	AL590723.1	SCARNA3/AL590723.1			9.85e-01	-1.00339
ILMN_3245712	LOC646493	MIR4788	MIR4788	LOC646493/MIR4788	hsa-mir-4788		6.72e-01	-1.02854
ILMN_3248213	LOC729668	AL161651.1	LOC729668	LOC729668/AL161651.1			6.34e-02	-1.13839
ILMN_3248781	SDHAP2	AC233280.3	AC233280.3	SDHAP2/AC233280.3			3.23e-01	-1.30224
ILMN_3249578	LOC100132394	FP671120.7	LOC100132394	LOC100132394/FP671120.7			4.45e-01	-1.58997
ILMN_3251587	LOC100008589	FP671120.7	LOC100008589	LOC100008589/FP671120.7			8.49e-01	-1.23371
ILMN_3259138	LOC100129495	AC074051.1	LOC100129495	LOC100129495/AC074051.1			1.20e-02	-1.11419
ILMN_3263974	KRT18P13	AL445531.1	AL445531.1	KRT18P13/AL445531.1			5.40e-06	-2.18859
ILMN_3267748	KRT18P19	AC118063.1	AC118063.1	KRT18P19/AC118063.1			6.95e-01	-1.02413
ILMN_3273229	LOC100129781	MIR193BHG	MIR193BHG	LOC100129781/MIR193BHG			6.19e-04	-1.90792
ILMN_3274790	LOC648921	AC105339.2	LOC648921	LOC648921/AC105339.2			7.77e-01	-1.06349
ILMN_3275685	LOC727721	MIR34AHG	MIR34AHG	LOC727721/MIR34AHG			9.18e-01	-1.00814
ILMN_3278835	LOC100131359	AF228730.2	LOC100131359	LOC100131359/AF228730.2			2.87e-01	-1.06032
ILMN_3283155	LOC642357	AC005000.1	LOC642357	LOC642357/AC005000.1			7.66e-05	-1.28521
ILMN_3283782	LOC100131234	MIR181A1HG	MIR181A1HG	LOC100131234/MIR181A1HG			2.91e-01	-1.05533
ILMN_3307992	MIR656	MIR410	MIR656	MIR656/MIR410			9.42e-01	-1.00579
ILMN_3307997	MIR550-2	MIR550A1	MIR550-2	MIR550-2/MIR550A1	hsa-mir-550a-1		5.83e-01	-1.03929
ILMN_3308015	MIR18B	MIR18B	MIR18B	MIR18B			4.40e-03	-1.1591
ILMN_3308025	MIR1913	MIR1913	MIR1913	MIR1913	hsa-mir-1913		7.20e-01	-1.02534
ILMN_3308035	MIR517B	MIR520D	MIR517B	MIR517B/MIR520D	hsa-mir-520d		8.96e-01	-1.01038
ILMN_3308038	MIR1322	MIR1322	MIR1322	MIR1322			7.30e-01	-1.02392
ILMN_3308053	MIR423	MIR423	MIR423	MIR423	hsa-mir-423	hsa-mir-423	7.72e-01	-1.0247
ILMN_3308063	MIR942	MIR942	MIR942	MIR942	hsa-mir-942	hsa-mir-942	3.41e-01	-1.04848
ILMN_3308068	MIR1289-1	MIR1289-1	MIR1289-1	MIR1289-1	hsa-mir-1289-1		9.35e-01	-1.00723
ILMN_3308073	MIR126	MIR126	MIR126	MIR126	hsa-mir-126	hsa-mir-126	6.73e-01	-1.02683
ILMN_3308098	MIR1274B	MIR1274B	MIR1274B	MIR1274B			6.97e-01	-1.01953
ILMN_3308108	MIR526A2	MIR526A2	MIR526A2	MIR526A2	hsa-mir-526a-2		4.99e-01	-1.04725
ILMN_3308118	MIR125B1	MIR125B1	MIR125B1	MIR125B1	hsa-mir-125b-1	hsa-mir-125b-1	5.39e-01	-1.0357
ILMN_3308123	MIR146A	MIR146A	MIR146A	MIR146A	hsa-mir-146a	hsa-mir-146a	9.28e-01	-1.00607
ILMN_3308133	MIR1296	MIR1296	MIR1296	MIR1296			7.34e-01	-1.02406
ILMN_3308143	MIR767	MIR767	MIR767	MIR767	hsa-mir-767	hsa-mir-767	7.08e-01	-1.02321
ILMN_3308153	MIRLET7G	MIRLET7G	MIRLET7G	MIRLET7G			9.31e-01	-1.00532
ILMN_3308158	MIR330	MIR330	MIR330	MIR330	hsa-mir-330	hsa-mir-330	1.08e-02	-1.19416
ILMN_3308178	MIR514-2	MIR514A2	MIR514-2	MIR514-2	hsa-mir-514a-2	hsa-mir-514a-2	9.57e-01	-1.0041
ILMN_3308188	MIR1976	MIR1976	MIR1976	MIR1976	hsa-mir-1976		9.42e-01	-1.00807
ILMN_3308195	MIR618	MIR618	MIR618	MIR618	hsa-mir-618		9.58e-01	-1.0042
ILMN_3308230	MIR515-2	MIR515-1	MIR515-2	MIR515-2/MIR515-1	hsa-mir-515-1		3.38e-01	-1.06003
ILMN_3308235	MIR608	MIR608	MIR608	MIR608	hsa-mir-608		5.02e-01	-1.04645
ILMN_3308285	MIR548I4	MIR548I4	MIR548I4	MIR548I4	hsa-mir-548i-4		4.61e-02	-1.08373
ILMN_3308295	MIR205	MIR205	MIR205	MIR205	hsa-mir-205		2.29e-04	-2.39496
ILMN_3308300	MIR548M	MIR548M	MIR548M	MIR548M	hsa-mir-548m		8.72e-01	-1.01213
ILMN_3308315	MIR1269	MIR1269A	MIR1269	MIR1269/MIR1269A	hsa-mir-1269a		9.67e-01	-1.00343
ILMN_3308320	MIR1227	MIR1227	MIR1227	MIR1227	hsa-mir-1227		3.87e-02	-1.10114
ILMN_3308330	MIR545	MIR545	MIR545	MIR545	hsa-mir-545	hsa-mir-545	9.03e-01	-1.00842
ILMN_3308345	MIR590	MIR590	MIR590	MIR590	hsa-mir-590	hsa-mir-590	4.00e-01	-1.05834
ILMN_3308355	MIR1246	MIR1246	MIR1246	MIR1246			7.81e-01	-1.0184
ILMN_3308365	MIR489	MIR489	MIR489	MIR489	hsa-mir-489		8.30e-01	-1.01333
ILMN_3308370	MIR30B	MIR30B	MIR30B	MIR30B	hsa-mir-30b	hsa-mir-30b	8.24e-01	-1.01628
ILMN_3308380	MIR200B	MIR200B	MIR200B	MIR200B			6.54e-01	-1.02612
ILMN_3308385	MIR301A	MIR301A	MIR301A	MIR301A	hsa-mir-301a	hsa-mir-301a	9.99e-01	-1.00004
ILMN_3308395	MIR1250	MIR1250	MIR1250	MIR1250	hsa-mir-1250		6.10e-01	-1.03483
ILMN_3308400	MIR516A1	MIR516A1	MIR516A1	MIR516A1			8.87e-01	-1.01066
ILMN_3308405	MIR802	MIR802	MIR802	MIR802	hsa-mir-802		8.53e-01	-1.01403
ILMN_3308415	MIR337	MIR337	MIR337	MIR337			6.01e-01	-1.03211
ILMN_3308420	MIR9-3	MIR9-3	MIR9-3	MIR9-3	hsa-mir-9-3	hsa-mir-9-3	9.77e-01	-1.00225
ILMN_3308425	MIR496	MIR496	MIR496	MIR496			7.68e-01	-1.02151
ILMN_3308435	MIR1914	MIR1914	MIR1914	MIR1914	ok same region		6.76e-01	-1.04239
ILMN_3308440	MIR584	MIR584	MIR584	MIR584			1.82e-02	-1.09733
ILMN_3308445	MIR642	MIR642A	MIR642	MIR642/MIR642A	hsa-mir-642a	hsa-mir-642a	4.09e-01	-1.05716
ILMN_3308450	MIR548L	MIR548L	MIR548L	MIR548L	hsa-mir-548l		6.86e-01	-1.02854
ILMN_3308455	MIR34A	MIR34A	MIR34A	MIR34A	hsa-mir-34a	hsa-mir-34a	9.91e-01	-1.00087
ILMN_3308460	MIR135A2	MIR135A2	MIR135A2	MIR135A2	hsa-mir-135a-2		8.74e-01	-1.01108
ILMN_3308465	MIR376A1	MIR376A1	MIR376A1	MIR376A1			6.22e-01	-1.03161
ILMN_3308475	MIR1236	MIR1236	MIR1236	MIR1236	hsa-mir-1236		7.73e-01	-1.01713
ILMN_3308485	MIR222	MIR222	MIR222	MIR222	hsa-mir-222	hsa-mir-222	9.65e-01	-1.00361
ILMN_3308495	MIR548K	MIR548K	MIR548K	MIR548K	hsa-mir-548k		9.59e-01	-1.0033
ILMN_3308550	MIR933	MIR933	MIR933	MIR933	hsa-mir-933		6.89e-01	-1.02705
ILMN_3308570	MIR765	MIR765	MIR765	MIR765	hsa-mir-765		9.82e-01	-1.00149
ILMN_3308580	MIR331	MIR331	MIR331	MIR331			6.31e-01	-1.0264
ILMN_3308585	MIR523	MIR519B	MIR523	MIR523/MIR519B	hsa-mir-519b		7.56e-02	-1.10803
ILMN_3308587	MIR944	MIR944	MIR944	MIR944	hsa-mir-944		3.32e-01	-1.04732
ILMN_3308592	MIR98	MIR98	MIR98	MIR98	hsa-mir-98	hsa-mir-98	5.00e-01	-1.08298
ILMN_3308617	MIR374A	MIR545	MIR374A	MIR374A/MIR545	hsa-mir-545	hsa-mir-545	5.35e-01	-1.038
ILMN_3308627	MIR1471	MIR1471	MIR1471	MIR1471	hsa-mir-1471		8.68e-01	-1.01607
ILMN_3308632	MIR617	MIR617	MIR617	MIR617	hsa-mir-617		3.20e-01	-1.06511
ILMN_3308642	MIR597	MIR597	MIR597	MIR597	hsa-mir-597		9.31e-01	-1.0063
ILMN_3308657	MIR518F	MIR518F	MIR518F	MIR518F	hsa-mir-518f		5.65e-01	-1.03512
ILMN_3308658	MIR1263	MIR1263	MIR1263	MIR1263	hsa-mir-1263		8.88e-01	-1.01375
ILMN_3308678	MIR412	MIR369	MIR412	MIR412/MIR369	hsa-mir-369	hsa-mir-369	8.59e-01	-1.01094
ILMN_3308688	MIR220C	MIR220C	MIR220C	MIR220C			8.11e-01	-1.0172
ILMN_3308693	MIR1302-6	MIR1302-6	MIR1302-6	MIR1302-6	hsa-mir-1302-6		8.75e-01	-1.01438
ILMN_3308698	MIR1276	MIR1276	MIR1276	MIR1276	hsa-mir-1276		3.52e-01	-1.06371
ILMN_3308703	MIR1302-8	MIR1302-8	MIR1302-8	MIR1302-8	hsa-mir-1302-8		8.10e-01	-1.01967
ILMN_3308713	MIR370	MIR370	MIR370	MIR370			9.57e-01	-1.00367
ILMN_3308733	MIR92A2	MIR19B2	MIR92A2	MIR92A2/MIR19B2	hsa-mir-19b-2	hsa-mir-19b-2	8.72e-01	-1.0122
ILMN_3308758	MIR1207	MIR1207	MIR1207	MIR1207	hsa-mir-1207		9.25e-01	-1.00646
ILMN_3308763	MIR377	MIR377	MIR377	MIR377			1.42e-01	-1.08073
ILMN_3308768	MIR302B	MIR302B	MIR302B	MIR302B	hsa-mir-302b		9.88e-01	-1.00102
ILMN_3308773	MIR1249	MIR1249	MIR1249	MIR1249			6.23e-01	-1.03083
ILMN_3308778	MIR488	MIR488	MIR488	MIR488			9.36e-01	-1.01108
ILMN_3308783	MIR1298	MIR1298	MIR1298	MIR1298	hsa-mir-1298		4.25e-01	-1.04333
ILMN_3308793	MIR934	MIR934	MIR934	MIR934	hsa-mir-934		3.92e-01	-1.04464
ILMN_3308798	MIR23B	MIR23B	MIR23B	MIR23B	hsa-mir-23b		9.10e-01	-1.00933
ILMN_3308803	MIR200A	MIR200A	MIR200A	MIR200A			1.31e-01	-1.08298
ILMN_3308813	MIR599	MIR599	MIR599	MIR599	hsa-mir-599		6.24e-01	-1.064
ILMN_3308818	MIR558	MIR558	MIR558	MIR558	hsa-mir-558		8.36e-01	-1.01319
ILMN_3308828	MIR1253	MIR1253	MIR1253	MIR1253	hsa-mir-1253		1.56e-01	-1.09051
ILMN_3308838	MIR552	MIR552	MIR552	MIR552	hsa-mir-552		6.04e-01	-1.03161
ILMN_3308848	MIR648	MIR648	MIR648	MIR648	hsa-mir-648		8.43e-01	-1.01607
ILMN_3308856	MIR520H	MIR520H	MIR520H	MIR520H	hsa-mir-520h		3.01e-01	-1.06194
ILMN_3308861	MIR525	MIR525	MIR525	MIR525	hsa-mir-525		7.81e-01	-1.01769
ILMN_3308871	MIR513A2	MIR513A2	MIR513A2	MIR513A2	hsa-mir-513a-2		9.16e-01	-1.00877
ILMN_3308876	MIR1234	MIR1234	MIR1234	MIR1234			5.87e-01	-1.04797
ILMN_3308886	MIR320B2	MIR320B2	MIR320B2	MIR320B2	hsa-mir-320b-2		6.33e-01	-1.03297
ILMN_3308891	MIR99A	MIR99A	MIR99A	MIR99A	hsa-mir-99a	hsa-mir-99a	8.19e-01	-1.01565
ILMN_3308896	MIR1255A	MIR1255A	MIR1255A	MIR1255A	hsa-mir-1255a		3.65e-01	-1.04739
ILMN_3308901	MIR1252	MIR1252	MIR1252	MIR1252	hsa-mir-1252		4.51e-04	-1.1274
ILMN_3308926	MIR454	MIR454	MIR454	MIR454	hsa-mir-454	hsa-mir-454	5.11e-01	-1.04667
ILMN_3308941	MIR616	MIR616	MIR616	MIR616	hsa-mir-616	hsa-mir-616	1.72e-01	-1.089
ILMN_3308971	MIR193A	MIR193A	MIR193A	MIR193A	hsa-mir-193a	hsa-mir-193a	5.36e-01	-1.03175
ILMN_3308976	MIR135B	MIR135B	MIR135B	MIR135B			7.71e-01	-1.02356
ILMN_3308996	MIR30D	MIR30D	MIR30D	MIR30D	hsa-mir-30d	hsa-mir-30d	9.80e-01	-1.00184
ILMN_3309001	MIR1-2	MIR1-2	MIR1-2	MIR1-2			7.44e-01	-1.02052
ILMN_3309006	MIR548C	MIR548C	MIR548C	MIR548C	hsa-mir-548c		3.97e-01	-1.04834
ILMN_3309011	MIR498	MIR498	MIR498	MIR498	hsa-mir-498		3.41e-01	-1.05416
ILMN_3309026	MIR654	AL132709.3	MIR654	MIR654/AL132709.3			6.03e-01	-1.02527
ILMN_3309046	MIR1255B1	MIR1255B1	MIR1255B1	MIR1255B1			6.10e-01	-1.02576
ILMN_3309059	MIR93	MIR106B	MIR93	MIR93/MIR106B	hsa-mir-106b	hsa-mir-106b	2.20e-01	-1.04761
ILMN_3309064	MIR10A	MIR10A	MIR10A	MIR10A	hsa-mir-10a	hsa-mir-10a	7.74e-01	-1.02087
ILMN_3309069	MIR591	MIR591	MIR591	MIR591	hsa-mir-591		6.63e-01	-1.03476
ILMN_3309074	MIR215	MIR215	MIR215	MIR215	hsa-mir-215		8.86e-01	-1.0122
ILMN_3309084	MIR224	MIR224	MIR224	MIR224	hsa-mir-224		5.65e-01	-1.03333
ILMN_3309089	MIR196B	MIR196B	MIR196B	MIR196B	hsa-mir-196b	hsa-mir-196b	3.04e-02	-1.10114
ILMN_3309104	MIR1180	MIR1180	MIR1180	MIR1180	hsa-mir-1180		7.54e-01	-1.02151
ILMN_3309109	MIR1200	MIR1200	MIR1200	MIR1200	hsa-mir-1200		6.89e-01	-1.02562
ILMN_3309133	MIR429	MIR429	MIR429	MIR429	hsa-mir-429		4.99e-01	-1.03699
ILMN_3309143	MIR9-1	C1orf61	MIR9-1	MIR9-1/ C1orf61	ok		4.61e-01	-1.0463
ILMN_3309148	MIR556	MIR556	MIR556	MIR556			9.23e-01	-1.00649
ILMN_3309153	MIR575	MIR575	MIR575	MIR575	hsa-mir-575		6.98e-01	-1.01953
ILMN_3309159	MIR199B	MIR199B	MIR199B	MIR199B	hsa-mir-199b	hsa-mir-199b	3.33e-01	-1.05453
ILMN_3309164	MIR1185-1	MIR1185-1	MIR1185-1	MIR1185-1	hsa-mir-1185-1	hsa-mir-1185-1	9.21e-01	-1.01284
ILMN_3309179	MIRLET7C	MIR99A	MIRLET7C	MIRLET7C/MIR99A	hsa-mir-99a	hsa-mir-99a	7.64e-01	-1.02683
ILMN_3309209	MIR495	MIR495	MIR495	MIR495			6.81e-01	-1.02045
ILMN_3309214	MIR509-3	MIR509-2	MIR509-3	MIR509-3/MIR509-2	hsa-mir-509-2	hsa-mir-509-2	9.31e-01	-1.00529
ILMN_3309219	MIR940	MIR940	MIR940	MIR940			7.79e-01	-1.02811
ILMN_3309229	MIR892A	MIR892A	MIR892A	MIR892A	hsa-mir-892a		6.87e-01	-1.02356
ILMN_3309239	MIR620	MIR620	MIR620	MIR620	hsa-mir-620		7.94e-01	-1.01762
ILMN_3309254	MIR647	MIR647	MIR647	MIR647	hsa-mir-647		9.67e-01	-1.00283
ILMN_3309264	MIR1295	MIR1295A	MIR1295	MIR1295/MIR1295A	hsa-mir-1295a		5.52e-01	-1.03118
ILMN_3309269	MIR557	MIR557	MIR557	MIR557	hsa-mir-557		2.58e-01	-1.07848
ILMN_3309274	MIR1468	MIR1468	MIR1468	MIR1468	hsa-mir-1468		5.15e-01	-1.04102
ILMN_3309304	MIR1238	MIR1238	MIR1238	MIR1238	hsa-mir-1238		5.45e-01	-1.04297
ILMN_3309324	MIR568	MIR568	MIR568	MIR568	hsa-mir-568		8.70e-01	-1.01523
ILMN_3309359	MIR1294	MIR1294	MIR1294	MIR1294	hsa-mir-1294		6.10e-01	-1.03555
ILMN_3309369	MIR652	MIR652	MIR652	MIR652			8.65e-01	-1.01094
ILMN_3309374	MIR1301	MIR1301	MIR1301	MIR1301			5.10e-01	-1.04456
ILMN_3309384	MIR153-2	MIR153-2	MIR153-2	MIR153-2	hsa-mir-153-2		5.87e-01	-1.03254
ILMN_3309394	MIR494	MIR494	MIR494	MIR494			4.98e-01	-1.04102
ILMN_3309404	MIR503	MIR424	MIR503	MIR503/MIR424			1.74e-01	-1.10191
ILMN_3309409	MIR106A	MIR18B	MIR106A	MIR106A/MIR18B			4.70e-02	-1.10114
ILMN_3309414	MIR519B	MIR519B	MIR519B	MIR519B	hsa-mir-519b		5.10e-01	-1.03426
ILMN_3309423	MIRLET7F1	MIRLET7A1	MIRLET7F1	MIRLET7F1/MIRLET7A1			9.14e-01	-1.00982
ILMN_3309433	MIR133B	MIR133B	MIR133B	MIR133B	hsa-mir-133b		7.06e-01	-1.01988
ILMN_3309448	MIR1247	MIR1247	MIR1247	MIR1247	hsa-mir-1247		6.50e-01	-1.03276
ILMN_3309473	MIR101-1	MIR101-1	MIR101-1	MIR101-1	hsa-mir-101-1	hsa-mir-101-1	6.40e-01	-1.02584
ILMN_3309478	MIR194-1	MIR194-1	MIR194-1	MIR194-1	hsa-mir-194-1		6.63e-01	-1.02783
ILMN_3309483	MIR450A2	MIR450A2	MIR450A2	MIR450A2			6.99e-02	-1.1088
ILMN_3309484	MIR10B	MIR10B	MIR10B	MIR10B	hsa-mir-10b	hsa-mir-10b	2.22e-01	-1.05782
ILMN_3309489	MIR563	MIR563	MIR563	MIR563	hsa-mir-563		2.28e-01	-1.05959
ILMN_3309494	MIR340	MIR340	MIR340	MIR340			7.49e-01	-1.02619
ILMN_3309499	MIR1284	MIR1284	MIR1284	MIR1284	hsa-mir-1284		6.17e-02	-1.08975
ILMN_3309509	MIR637	MIR637	MIR637	MIR637	hsa-mir-637		5.66e-01	-1.03951
ILMN_3309519	MIR548N	MIR548N	MIR548N	MIR548N	hsa-mir-548n		5.02e-01	-1.03347
ILMN_3309529	MIR2276	MIR2276	MIR2276	MIR2276	hsa-mir-2276		4.24e-01	-1.04427
ILMN_3309559	MIR124-2	MIR124-2	MIR124-2	MIR124-2	hsa-mir-124-2		3.88e-01	-1.04341
ILMN_3309565	MIR548H1	MIR548H1	MIR548H1	MIR548H1	hsa-mir-548h-1		3.83e-01	-1.04739
ILMN_3309574	MIR646	MIR646	MIR646	MIR646	hsa-mir-646		8.01e-01	-1.01727
ILMN_3309594	MIR16-1	MIR16-1	MIR16-1	MIR16-1	hsa-mir-16-1	hsa-mir-16-1	3.79e-01	-1.04117
ILMN_3309624	MIR296	MIR296	MIR296	MIR296	hsa-mir-296	hsa-mir-296	9.54e-01	-1.00443
ILMN_3309629	MIR144	MIR4732	MIR144	MIR144/MIR4732	hsa-mir-4732		7.18e-01	-1.02151
ILMN_3309664	MIR300	MIR376A1	MIR300	MIR300/MIR376A1			6.59e-01	-1.03605
ILMN_3309684	MIR153-1	MIR153-1	MIR153-1	MIR153-1	hsa-mir-153-1		2.94e-01	-1.04826
ILMN_3309699	MIR29B1	MIR29B1	MIR29B1	MIR29B1	hsa-mir-29b-1	hsa-mir-29b-1	8.41e-01	-1.01565
ILMN_3309714	MIR1979	MIR1979	MIR1979	MIR1979			5.54e-01	-1.04326
ILMN_3309734	MIR580	MIR580	MIR580	MIR580	hsa-mir-580		9.25e-01	-1.00716
ILMN_3309739	MIRLET7D	MIRLET7D	MIRLET7D	MIRLET7D			5.99e-01	-1.09505
ILMN_3309749	MIR659	MIR659	MIR659	MIR659	hsa-mir-659		5.73e-01	-1.03261
ILMN_3309769	MIR379	MIR379	MIR379	MIR379			5.34e-01	-1.03692
ILMN_3309774	MIR324	MIR324	MIR324	MIR324			8.77e-01	-1.01031
ILMN_3309779	MIR107	MIR107	MIR107	MIR107	hsa-mir-107		3.18e-01	-1.0495
ILMN_3309794	MIR548F2	MIR548F2	MIR548F2	MIR548F2	hsa-mir-548f-2		7.14e-01	-1.02897
ILMN_3309809	MIR562	MIR562	MIR562	MIR562	hsa-mir-562		5.06e-01	-1.04355
ILMN_3309819	MIR1912	MIR1912	MIR1912	MIR1912	hsa-mir-1912		3.62e-01	-1.05673
ILMN_3309824	MIR452	MIR452	MIR452	MIR452			6.30e-01	-1.02292
ILMN_3309829	MIR373	MIR372	MIR373	MIR373	hsa-mir-372		3.01e-01	-1.07549
ILMN_3309849	MIR140	MIR140	MIR140	MIR140	hsa-mir-140	hsa-mir-140	3.20e-01	-1.05885
ILMN_3309879	MIR595	MIR595	MIR595	MIR595	hsa-mir-595		4.48e-01	-1.04153
ILMN_3309884	MIR1203	MIR1203	MIR1203	MIR1203	hsa-mir-1203		5.11e-01	-1.02968
ILMN_3309889	MIR570	MIR570	MIR570	MIR570	hsa-mir-570	hsa-mir-570	7.17e-01	-1.02179
ILMN_3309894	MIR19B2	MIR19B2	MIR19B2	MIR19B2	hsa-mir-19b-2	hsa-mir-19b-2	8.71e-01	-1.01326
ILMN_3309899	MIR549	MIR549A	MIR549	MIR549/MIR549A	hsa-mir-549a		3.71e-01	-1.05731
ILMN_3309909	MIR1286	MIR1286	MIR1286	MIR1286			9.84e-01	-1.00125
ILMN_3309919	MIR455	MIR455	MIR455	MIR455			2.30e-01	-1.0557
ILMN_3309929	MIR668	AL132709.5	MIR668	MIR668/AL132709.5			4.87e-01	-1.04507
ILMN_3309945	MIR409	MIR412	MIR409	MIR409/MIR412	hsa-mir-412		9.33e-01	-1.00511
ILMN_3309955	MIR194-2	MIR192	MIR194-2	MIR194-2/MIR192			2.40e-01	-1.06106
ILMN_3309960	MIR363	MIR19B2	MIR363	MIR363/MIR19B2	hsa-mir-19b-2	hsa-mir-19b-2	3.19e-01	-1.06025
ILMN_3309965	MIRLET7F2	MIRLET7F2	MIRLET7F2	MIRLET7F2	hsa-let-7f-2	hsa-let-7f-2	5.80e-01	-1.03283
ILMN_3309970	MIR554	MIR554	MIR554	MIR554	hsa-mir-554		3.82e-01	-1.03958
ILMN_3309975	MIR7-1	MIR7-1	MIR7-1	MIR7-1	hsa-mir-7-1	hsa-mir-7-1	2.45e-02	-1.11342
ILMN_3309985	MIR325	MIR325	MIR325	MIR325	hsa-mir-325		7.01e-01	-1.03004
ILMN_3309990	MIR1256	MIR1256	MIR1256	MIR1256	hsa-mir-1256		6.79e-02	-1.09885
ILMN_3309995	MIR383	MIR383	MIR383	MIR383	hsa-mir-383		3.48e-01	-1.05373
ILMN_3310005	MIR876	MIR876	MIR876	MIR876	hsa-mir-876	hsa-mir-876	7.54e-01	-1.02023
ILMN_3310010	MIR146B	MIR146B	MIR146B	MIR146B			7.95e-01	-1.01692
ILMN_3310015	MIR631	MIR631	MIR631	MIR631	hsa-mir-631		9.61e-01	-1.00348
ILMN_3310030	MIR1265	MIR1265	MIR1265	MIR1265	hsa-mir-1265		9.01e-01	-1.00828
ILMN_3310035	MIR2116	MIR2116	MIR2116	MIR2116	hsa-mir-2116	hsa-mir-2116	7.75e-01	-1.04841
ILMN_3310040	MIR7-3	MIR7-3	MIR7-3	MIR7-3	hsa-mir-7-3		6.94e-01	-1.02321
ILMN_3310055	MIR760	MIR760	MIR760	MIR760			2.01e-01	-1.06636
ILMN_3310070	MIR32	MIR32	MIR32	MIR32	hsa-mir-32	hsa-mir-32	4.26e-01	-1.03915
ILMN_3310080	MIR614	MIR614	MIR614	MIR614	hsa-mir-614		1.75e-01	-1.08373
ILMN_3310088	MIR1827	MIR1827	MIR1827	MIR1827			9.98e-01	-1.00018
ILMN_3310121	MIR629	MIR629	MIR629	MIR629	hsa-mir-629	hsa-mir-629	8.22e-01	-1.01537
ILMN_3310126	MIR519D	MIR519D	MIR519D	MIR519D	hsa-mir-519d		2.30e-01	-1.06467
ILMN_3310131	MIRLET7A2	MIRLET7A2	MIRLET7A2	MIRLET7A2	hsa-let-7a-2	hsa-let-7a-2	8.10e-01	-1.01389
ILMN_3310166	MIR99B	MIRLET7E	MIR99B	MIR99B/MIRLET7E			9.44e-01	-1.00454
ILMN_3310176	MIR593	MIR593	MIR593	MIR593	hsa-mir-593		3.84e-01	-1.05592
ILMN_3310181	MIR302E	MIR302E	MIR302E	MIR302E	hsa-mir-302e		3.81e-01	-1.04333
ILMN_3310191	MIR411	MIR411	MIR411	MIR411			3.83e-01	-1.05088
ILMN_3310211	MIR542	MIR542	MIR542	MIR542			1.18e-01	-1.074
ILMN_3310216	MIR1911	MIR1911	MIR1911	MIR1911	hsa-mir-1911		1.17e-02	-1.09733
ILMN_3310226	MIR548F4	MIR548F4	MIR548F4	MIR548F4	hsa-mir-548f-4		2.96e-01	-1.05395
ILMN_3310241	MIR548F3	MIR548F3	MIR548F3	MIR548F3	hsa-mir-548f-3		7.18e-01	-1.02087
ILMN_3310251	MIR1266	MIR1266	MIR1266	MIR1266			8.28e-01	-1.01466
ILMN_3310266	MIR548O	MIR548O	MIR548O	MIR548O	hsa-mir-548o		8.79e-01	-1.01003
ILMN_3310281	MIRLET7E	MIRLET7E	MIRLET7E	MIRLET7E			9.33e-01	-1.01122
ILMN_3310296	MIR937	MIR937	MIR937	MIR937	hsa-mir-937		5.68e-01	-1.02954
ILMN_3310326	MIR221	MIR222	MIR221	MIR221/MIR222	hsa-mir-222	hsa-mir-222	7.52e-02	-1.1235
ILMN_3310331	MIR183	MIR183	MIR183	MIR183	hsa-mir-183	hsa-mir-183	8.63e-01	-1.0127
ILMN_3310336	MIR450A1	MIR450A2	MIR450A1	MIR450A1/MIR450A2			6.00e-02	-1.07998
ILMN_3310341	MIR592	MIR592	MIR592	MIR592			5.12e-01	-1.04182
ILMN_3310356	MIR27B	MIR23B	MIR27B	MIR27B/MIR23B	hsa-mir-23b		8.43e-02	-1.10038
ILMN_3310366	MIR365-2	MIR365B	MIR365-2	MIR365-2/MIR365B	hsa-mir-365b	hsa-mir-365b	7.76e-01	-1.01981
ILMN_3310381	MIR505	MIR505	MIR505	MIR505			1.39e-02	-1.12428
ILMN_3310391	MIR1204	MIR1204	MIR1204	MIR1204	hsa-mir-1204		7.03e-01	-1.02847
ILMN_3310396	MIR422A	MIR422A	MIR422A	MIR422A	hsa-mir-422a		6.30e-01	-1.03756
ILMN_3310401	MIR24-1	MIR23B	MIR24-1	MIR24-1/MIR23B	hsa-mir-23b		2.80e-01	-1.05416
ILMN_3310411	MIR1302-1	MIR1302-1	MIR1302-1	MIR1302-1			8.32e-01	-1.01586
ILMN_3310461	MIR196A2	MIR196A2	MIR196A2	MIR196A2	hsa-mir-196a-2	hsa-mir-196a-2	9.80e-01	-1.00191
ILMN_3310466	MIR572	MIR572	MIR572	MIR572	hsa-mir-572		6.98e-01	-1.02747
ILMN_3310471	MIR587	MIR587	MIR587	MIR587	hsa-mir-587		8.12e-01	-1.01621
ILMN_3310476	MIR508	MIR508	MIR508	MIR508	hsa-mir-508	hsa-mir-508	8.68e-01	-1.01277
ILMN_3310486	MIR190	MIR190A	MIR190	MIR190/MIR190A	hsa-mir-190a	hsa-mir-190a	4.59e-01	-1.03326
ILMN_3310509	MIR30C2	MIR30C2	MIR30C2	MIR30C2			1.25e-02	-1.16878
ILMN_3310538	MIR585	MIR585	MIR585	MIR585	hsa-mir-585		7.86e-01	-1.01501
ILMN_3310543	MIR1258	MIR1258	MIR1258	MIR1258	hsa-mir-1258		3.25e-01	-1.05643
ILMN_3310558	MIR302D	MIR302B	MIR302D	MIR302D/MIR302B	hsa-mir-302b		9.32e-01	-1.00758
ILMN_3310563	MIR606	MIR606	MIR606	MIR606	hsa-mir-606		9.91e-01	-1.00079
ILMN_3310568	MIR598	MIR598	MIR598	MIR598			2.96e-01	-1.05234
ILMN_3310573	MIR24-2	MIR27A	MIR24-2	MIR24-2/MIR27A	hsa-mir-27a	hsa-mir-27a	3.19e-01	-1.04681
ILMN_3310598	MIR376B	MIR376C	MIR376B	MIR376B/MIR376C			6.05e-01	-1.03548
ILMN_3310603	MIR1305	MIR1305	MIR1305	MIR1305	hsa-mir-1305		4.57e-01	-1.03821
ILMN_3310608	MIR720	MIR720	MIR720	MIR720			8.38e-01	-1.01706
ILMN_3310613	MIR216B	MIR216B	MIR216B	MIR216B	hsa-mir-216b		6.88e-01	-1.02378
ILMN_3310623	MIR128-1	MIR128-1	MIR128-1	MIR128-1			7.33e-01	-1.02876
ILMN_3310628	MIR921	MIR921	MIR921	MIR921	hsa-mir-921		4.83e-01	-1.04109
ILMN_3310633	MIR634	MIR634	MIR634	MIR634	hsa-mir-634		3.40e-01	-1.04841
ILMN_3310643	MIR886	MIR886	MIR886	MIR886/	ok same region		4.40e-01	-1.07252
ILMN_3310653	MIR361	MIR361	MIR361	MIR361			8.76e-01	-1.0134
ILMN_3310658	MIR943	MIR943	MIR943	MIR943	hsa-mir-943		1.73e-01	-1.06459
ILMN_3310663	MIR665	MIR337	MIR665	MIR665/MIR337			5.14e-01	-1.03936
ILMN_3310668	MIR551A	MIR551A	MIR551A	MIR551A	hsa-mir-551a		9.80e-01	-1.00185
ILMN_3310673	MIR1208	MIR1208	MIR1208	MIR1208	hsa-mir-1208		9.46e-01	-1.00506
ILMN_3310678	MIR613	MIR613	MIR613	MIR613	hsa-mir-613		9.89e-01	-1.00114
ILMN_3310683	MIR548A1	MIR548A1	MIR548A1	MIR548A1	hsa-mir-548a-1		9.49e-01	-1.00421
ILMN_3310695	MIR299	MIR299	MIR299	MIR299			8.78e-01	-1.00849
ILMN_3310705	MIR573	MIR573	MIR573	MIR573	hsa-mir-573		4.70e-01	-1.05015
ILMN_3310710	MIR518E	MIR518E	MIR518E	MIR518E	hsa-mir-518e		6.27e-02	-1.09962
ILMN_3310715	MIR512-2	MIR512-1	MIR512-2	MIR512-2/MIR512-1	hsa-mir-512-2		2.38e-01	-1.08222
ILMN_3310720	MIR1229	MIR1229	MIR1229	MIR1229	hsa-mir-1229		7.16e-01	-1.02861
ILMN_3310725	MIR453	MIR323B	MIR453	MIR453/MIR323B	hsa-mir-323b		5.28e-01	-1.03397
ILMN_3310735	MIR873	MIR873	MIR873	MIR873			4.70e-01	-1.04052
ILMN_3310740	MIR718	MIR718	MIR718	MIR718	hsa-mir-718		8.78e-01	-1.0148
ILMN_3310760	MIR519A2	AC011453.2	MIR519A2	MIR519A2/AC011453.2			9.55e-01	-1.00317
ILMN_3310775	MIR1323	MIR1323	MIR1323	MIR1323	hsa-mir-1323		3.69e-02	-1.1235
ILMN_3310785	MIR1299	AL353763.1	MIR1299	MIR1299/AL353763.1			2.77e-02	-1.11111
ILMN_3310790	MIR626	MIR626	MIR626	MIR626	hsa-mir-626		4.12e-01	-1.04848
ILMN_3310805	MIR625	MIR625	MIR625	MIR625	hsa-mir-625	hsa-mir-625	9.57e-01	-1.00427
ILMN_3310825	MIR670	MIR670	MIR670	MIR670	hsa-mir-670		7.43e-01	-1.02073
ILMN_3310830	MIR1262	MIR1262	MIR1262	MIR1262	hsa-mir-1262		6.38e-01	-1.04797
ILMN_3310835	MIR20B	MIR19B2	MIR20B	MIR20B/MIR19B2	hsa-mir-19b-2	hsa-mir-19b-2	4.86e-01	-1.03893
ILMN_3310855	MIR1183	MIR1183	MIR1183	MIR1183	hsa-mir-1183		6.26e-01	-1.03333
ILMN_3310870	MIR577	MIR577	MIR577	MIR577	hsa-mir-577	hsa-mir-577	5.81e-01	-1.03699
ILMN_3310880	MIR187	MIR187	MIR187	MIR187	hsa-mir-187		7.71e-01	-1.02229
ILMN_3310885	MIR376C	AL132709.3	MIR376C	MIR376C/AL132709.3			9.50e-01	-1.00456
ILMN_3310895	MIR649	MIR649	MIR649	MIR649	hsa-mir-649		7.52e-01	-1.01932
ILMN_3310900	MIR553	MIR553	MIR553	MIR553	hsa-mir-553		6.49e-01	-1.02697
ILMN_3310920	MIR202	MIR202	MIR202	MIR202	hsa-mir-202	hsa-mir-202	8.26e-01	-1.02101
ILMN_3310930	MIR519E	MIR519E	MIR519E	MIR519E	hsa-mir-519e		7.10e-01	-1.02307
ILMN_3310950	MIR203	MIR203A	MIR203	MIR203/MIR203A	hsa-mir-203a	hsa-mir-203a	2.26e-01	-1.05402
ILMN_3310965	MIR1274A	MIR1274A	MIR1274A	MIR1274A			1.39e-01	-1.07773
ILMN_3310970	MIR744	MIR744	MIR744	MIR744	hsa-mir-744	hsa-mir-744	7.24e-01	-1.02342
ILMN_3310975	MIR539	MIR539	MIR539	MIR539			6.85e-01	-1.02598
ILMN_3310995	MIR578	MIR578	MIR578	MIR578	hsa-mir-578		7.17e-01	-1.01833
ILMN_3311000	MIR507	MIR506	MIR507	MIR507/MIR506	hsa-mir-506	hsa-mir-506	2.76e-01	-1.06585
ILMN_3311005	MIR212	MIR212	MIR212	MIR212	hsa-mir-212		2.14e-01	-1.074
ILMN_3311030	MIR185	MIR185	MIR185	MIR185			3.08e-01	-1.11342
ILMN_3311035	MIR1251	MIR1251	MIR1251	MIR1251			5.11e-01	-1.03462
ILMN_3311040	MIR338	AC115099.1	MIR338	MIR338/AC115099.1			3.16e-01	-1.05256
ILMN_3311045	MIR216A	MIR216A	MIR216A	MIR216A	hsa-mir-216a		8.10e-04	-1.2201
ILMN_3311050	MIR384	MIR384	MIR384	MIR384			1.30e-01	-1.09733
ILMN_3311070	MIR33B	MIR33B	MIR33B	MIR33B	hsa-mir-33b	hsa-mir-33b	4.88e-01	-1.04073
ILMN_3311075	MIR1915	MIR1915	MIR1915	MIR1915	hsa-mir-1915		9.25e-02	-1.11497
ILMN_3311080	MIR490	MIR490	MIR490	MIR490	hsa-mir-490	hsa-mir-490	7.24e-01	-1.02983
ILMN_3311100	MIRLET7A1	MIRLET7A1	MIRLET7A1	MIRLET7A1			9.02e-02	-1.07475
ILMN_3311110	MIR335	MIR335	MIR335	MIR335	hsa-mir-335	hsa-mir-335	5.52e-01	-1.04153
ILMN_3311120	MIR548P	MIR548P	MIR548P	MIR548P	hsa-mir-548p		8.92e-01	-1.008
ILMN_3311130	MIR1255B2	MIR1255B2	MIR1255B2	MIR1255B2	hsa-mir-1255b-2		2.03e-01	-1.05812
